1 **Title:**

2 Genetic mapping of species differences via “*in vitro* crosses” in mouse embryonic stem cells

3 **Impact Statement:**

4 By mixing hybrid mouse genomes in stem cells via mitotic recombination, genetic mapping and  
5 hybrid mosaic mice can be achieved in weeks, even across species barriers.

6 **Authors:**

7 Stefano Lazzarano<sup>1</sup>, Marek Kučka<sup>1</sup>, João P. L. Castro<sup>1</sup>, Ronald Naumann<sup>2</sup>, Paloma Medina<sup>1,†</sup>,  
8 Michael N. C. Fletcher<sup>1,†</sup>, Rebecka Wombacher<sup>1,†</sup>, Joost Gribnau<sup>3</sup>, Tino Hochepped<sup>4</sup>, Claude  
9 Libert<sup>4</sup>, Yingguang Frank Chan<sup>1,\*</sup>

10 **Affiliations:**

11 1. Friedrich Miescher Laboratory of the Max Planck Society, Tübingen, Germany

12 2. Max Planck Institute of Cell Biology and Genetics, Dresden, Germany

13 3. Department of Reproduction and Development, Erasmus MC, Rotterdam, The  
14 Netherlands

15 4. VIB-UGent Center for Inflammation Research, Department of Biomedical Molecular  
16 Biology, Ghent University, Ghent, Belgium

17 \* Correspondence to: frank.chan@tue.mpg.de

18 † Current address: P.M.: Department of Biomolecular Engineering, University of California,  
19 Santa Cruz, Santa Cruz, CA, USA; M.N.C.F.: Department of Molecular Genetics, German  
20 Cancer Research Center (DKFZ), Heidelberg, Germany; R.W.: Department of Infectious  
21 Diseases, University Hospital Heidelberg, Heidelberg, Germany

22 **Abstract:**

23 Discovering the genetic changes underlying species differences is a central goal in  
24 evolutionary genetics. However, hybrid crosses between species in mammals often suffer from  
25 hybrid sterility, greatly complicating genetic dissection of trait variation. Here we describe a

26 simple, robust and transgene-free technique to make “*in vitro* crosses” in hybrid mouse  
27 embryonic stem cells by inducing random mitotic crossovers with the drug ML216, which inhibits  
28 *Bloom syndrome* (BLM). Starting with an interspecific hybrid (between *Mus musculus* and *Mus*  
29 *spretus*) embryonic stem cell line spanning 1.5 million years of divergence, we demonstrate the  
30 feasibility of mapping enzymatic differences across species within weeks and the possibility of  
31 re-deriving whole mice. Our work shows how *in vitro* crosses can overcome major bottlenecks  
32 like hybrid sterility in traditional mouse breeding to address fundamental questions in  
33 evolutionary biology.

#### 34 **Main Text:**

35        Discovering the genetic changes underlying species differences is a central goal in  
36 evolutionary genetic (1). However, hybrid crosses between even recently diverged species in  
37 animals often suffer from hybrid sterility (1, 2), greatly complicating genetic mapping of trait  
38 variation, especially in mammals. On the other hand, within-species genetic mapping has been  
39 tremendously successful in linking genetic polymorphisms to trait variations in innumerable  
40 organisms since the early twentieth century (3-5). Almost all mapping studies across diverse  
41 species have depended on meiotic linkage mapping panels generated through breeding to  
42 identify genetic loci controlling trait variations, or quantitative trait loci (QTL). Mapping resolution  
43 depends largely on crossovers arising from meiotic recombination to disentangle linked genetic  
44 associations. Accordingly, to achieve high-resolution mapping to the level of individual genes,  
45 researchers are driven to create ever-larger mapping populations and/or accumulating  
46 recombination over at least two, often many generations (6-8). In this respect, genetic studies in  
47 the mouse are complicated by the relatively long generation times and small litter sizes, which  
48 often decline further over generations due to increased inbreeding. Consequently, compared to  
49 yeast, worms and *Arabidopsis* (6-8), genetic mapping in the mouse requires far greater  
50 resources, yet relatively few traits have been mapped to the gene level (but see landmark

51 studies identifying *Tlr4* and *Prdm9*) (9, 10). This challenge was particularly acute for panels  
52 involving divergence at or beyond the species level, where the difficulty or impossibility in  
53 generating fertile crosses calls into question whether the panel could be generated in the first  
54 place. Nonetheless, the potential to reveal unique biology occurring at the species boundaries in  
55 mammalian evolution makes such panels worthy attempts, even allowing for lower mapping  
56 resolution (11-15). This is because evolutionary changes in trait architecture can reveal much  
57 about the underlying evolutionary process. In this respect, direct assaying of hybrid genomes  
58 offers advantages unmatched by simpler single-gene functional assays or comparative  
59 transcriptome or sequence analyses, because it integrates actual interactions of every gene in  
60 the hybrid genomes. We argue that even cellular or expression phenotypes from such  
61 recombinant hybrids should offer unique insight into genome function and evolution. Should  
62 genetic exchange in hybrid animal genomes become feasible, direct genetic mapping of species  
63 differences would become routinely possible.

64 We set out to establish a universal method that allows genetic mapping in mammals  
65 without breeding, even across divergent species. We choose to initially focus on a cellular  
66 system based on mouse ES cells, which opens up the possibility of employing the full range of  
67 genetic manipulation available in tissue culture systems. We also anticipate that the rise of  
68 national biobank repositories for human induced pluripotent stem cells (iPSCs), together with the  
69 rapid development of organoid assays will ultimately counteract current limits in a purely cellular  
70 phenotyping system. In fact, “cellular phenotyping” offers many advantages over organismal  
71 assays in scale, costs and reproducibility. Therefore we have chosen hybrid mouse ES cells as  
72 an ideal setting to establish an *in vitro* cross system. A minimal system will have the two  
73 following features: an ability to induce on-demand extensive genetic exchange; and genetic (and  
74 trait) variation such as those found in F1 hybrid ES cells.

75 Intriguingly, the technique to create genetic variation through recombination has been in

76 broad use in the mouse genetics community, albeit never explicitly in F1 hybrid ES cells with the  
77 goal of genetic mapping. In 2004, two independent groups showed that recessive, biallelic  
78 mutants could be reliably recovered in mouse ES cells without breeding by suppressing *Bloom*  
79 *Syndrome* (BLM; Fig. 1a) (16, 17). Yusa and coworkers showed that these recessive mutants  
80 arose via mitotic recombination between homologous chromosomes (18). We reasoned that the  
81 same mechanism could be leveraged to generate genome-wide random *mitotic recombination*.  
82 This mechanism enabled the creation of panels of arbitrary size carrying recombinant genomes,  
83 while avoiding the limitations of hybrid sterility or inbreeding depression (Fig. 1b).





- 101 ML216 treatment (25  $\mu$ M), IVR rate was estimated to be  $2.9 \times 10^{-4}$  per cell per generation, yielding 800–  
102 1500 FIAU-resistant colonies per million following treatment.

103 [Main Text cont'd]

104 To test if BLM inhibition could lead to elevated homologous recombination rates in  
105 mitosis, we inhibited BLM in a number of mouse ES cell lines using a recently discovered small  
106 molecule inhibitor ML216 (Fig. 1c) (20). As a first test, we started with F1 ES cells between two  
107 laboratory mouse strains (C57BL/6J and 129, abbreviated to “BL6” and “129” here) that carried a  
108 targeted transgene as a hemizygous allele at the *GtRosa26* locus on distal Chromosome 6. We  
109 estimated homologous recombination by counting colony survival under fialuridine (FIAU)  
110 treatment, which selected against the transgene, which carried the dominant marker hygromycin  
111 phosphotransferase–thymidine kinase (HyTK) and green fluorescent protein (GFP; Fig. 1–Figure  
112 Supplement 1). We found that BLM inhibition led to highly elevated rates of homologous  
113 recombination, as revealed by increased numbers of FIAU-resistant colonies (Fig. 1c; *in vitro*  
114 recombination rate:  $2.9 \times 10^{-4}$  per cell per generation) and the appearance of mosaic GFP  
115 expression within a colony (Fig. 2a, right panels). This is broadly consistent with previously  
116 reported rates under direct *Blm* suppression or disruption (targeted tetracycline inhibition or  
117 knockout alleles:  $2.3\text{--}4.2 \times 10^{-4}$ ; compared to wildtype rates between  $8.5 \times 10^{-6}\text{--}2.3 \times 10^{-5}$ ) (16, 17).  
118 The small molecule BLM inhibitor ML216 offers unique experimental advantages, because its  
119 application is simple, rapid and reversible, eliminating the use of transgenes for *Blm* disruption or  
120 suppression (16, 17) or repeated transfections of small interfering RNA to achieve continued  
121 suppression of *Blm*. Importantly, elevated homologous recombination under BLM inhibition is  
122 not associated with increased aneuploidy (n=154 metaphase spreads; Mann-Whitney U test,  
123  $W=1871$ ,  $h_1 > 0$ , n.s.; Fig. 1–Figure Supplement 2a). Further, ML216-treated ES cells retained  
124 robust expression of NANOG, a key marker for stemness (Fig. 1–Figure Supplement 3).

125

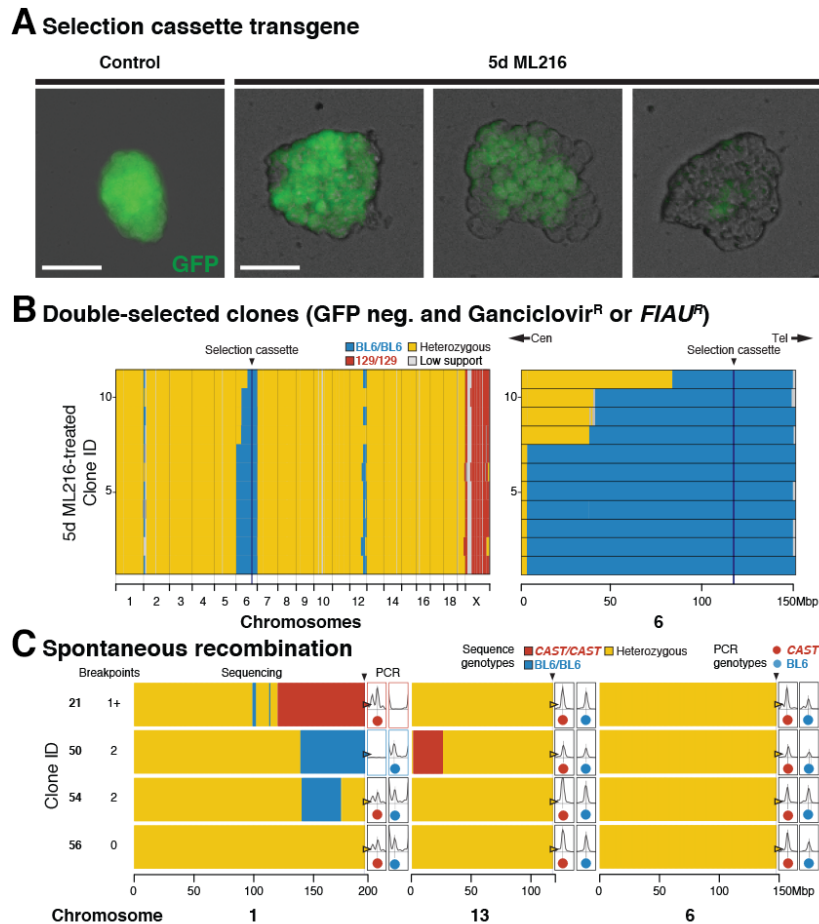

126  
127

**Fig. 2. Widespread *in vitro* recombination across a range of evolutionary divergence.**

128 **(A)** ES cell colonies displayed mosaic GFP expression within a colony when cultured with ML216, but not  
 129 under control conditions, consistent with homologous recombination and loss of GFP through IVR.  
 130 Recombination between homologous chromosomes could result in daughter cells with two wildtype (BL6  
 131 allele, green) or transgenic copies (129 allele, not green). Early recombination events followed by random  
 132 cell loss during clonal expansion could produce completely dark colonies. Scale bar = 100  $\mu$ m. **(B)** After  
 133 expansion under negative selection against the transgene (both ganciclovir and FIAU kill cells expressing  
 134 HyTK), 11 ganciclovir-resistant and GFP-negative colonies were whole genome sequenced. Selection  
 135 favoured loss of transgene (homozygous BL6/BL6 genotypes) at distal Chromosome 6. In contrast to  
 136 normal meiotic recombination (averaging 1 or more crossovers per chromosome pair), mitotic  
 137 recombination typically affected only a single chromosome pair: much of the genome remained  
 138 heterozygous (yellow), with the exception of the transgene-carrying chromosome 6 (mostly BL6/BL6,  
 139 blue) and the single 129 Chromosome X (male, 129, red). Mitotic recombination events converted

140 genotypes telomeric to the breakpoint towards homozygosity (LOH, yellow to blue). **(C)** IVR also  
141 occurred in cells carrying divergent genomes with no transgenes. (BL6 x CAST)F1 hybrid ES cells were  
142 treated with ML216 and screened by PCR genotyping at diagnostic telomeric markers. Selected clones  
143 (two recombinant and control clones each) were whole genome sequenced, showing recombination  
144 events towards both homozygous genotypes, consistent with PCR genotype screening results (total  
145 breakpoints per clone ranged from 0–2). Additional recombination events were also recovered, even  
146 though the Chromosome 1 telomeric marker remained heterozygous (clone 54). These clones also  
147 carried non-recombined chromosomes (e.g., Chromosome 6, fully heterozygous, yellow).  
148

149 [Main Text cont'd]

150 To determine the frequency and distribution of mitotic crossovers under ML216-  
151 mediated BLM inhibition, we sequenced and compared the genomes of 11 clones that survived  
152 ganciclovir selection (a FIAU alternative; Fig. 2b). We also treated F1 hybrid ES cells derived  
153 from BL6 and *Mus castaneus* (diverged ~1 million years ago; CAST/EiJ, abbreviated to CAST  
154 here) (21) with ML216 but otherwise grown under non-selective conditions. Using the  
155 transgene-free (BL6 x CAST)F1 line (21), we screened 46 randomly-picked ML216-treated  
156 clones for spontaneous LOH recombinants and recovered recombinants in both directions on  
157 Chromosome 1. Sequencing of specific recombinant clones revealed conversion from F1  
158 heterozygous genotypes towards both BL6/BL6 and CAST/CAST homozygous genotypes at  
159 the telomeres (Fig. 2c, clones 21 and 50, note also additional recombination on  
160 Chromosome 13). In contrast, control non-recombinant clones retained heterozygosity at the  
161 telomeres (clone 54 and 56). But even here we discovered a single clone carrying additional  
162 internal recombinants on Chromosome 1 (Fig. 2c).

163 Genome-wide sequencing of the recombinants revealed several striking patterns. First,  
164 crossover breakpoints were distributed along the entire chromosome (e.g., Chromosome 6 in  
165 Fig. 2b), echoing previous reports in other *Blm*-suppressed ES cells (18), suggesting  
166 recombinants can be used for mapping this as well as other cellular traits. Second, FIAU  
167 selection strongly and significantly enriched for recombinant chromosomes compared to  
168 unselected conditions (n=11 out of 11 vs. 9 out of 826; Fisher Exact Test,  $P < 2.2 \times 10^{-16}$ ), with the  
169 recombination map biased strongly by the location of the selection cassette (all 11 crossovers  
170 were centromeric to Chromosome 6, 113Mbp, Fig. 2b). Our data suggest that chromosome  
171 segments telomeric to the cassette did not affect selection and were free to recombine. This  
172 observation, while relatively trivial for a targeted transgene here, was nonetheless instructive in  
173 the following, more nuanced cases involving natural variations. Third, crossovers created by

174 mitotic recombination usually occurred only on one or few chromosomes at a time (Fig. 2b, c;  
175 Fig. 2–Figure Supplement 1), in stark contrast to an average of one crossover per chromosome  
176 arm during meiosis. Importantly, our results are in broad agreement with other reports of  
177 mitotic recombination (18, 22). Taken together, the data show that BLM inhibition efficiently  
178 generated *in vitro* recombination (IVR) across wide evolutionary distance and IVR ES cell panels  
179 may constitute genetically distinct lineages ideal for genetic mapping.

180 Our experiments to determine IVR rate demonstrated that among the chromosome-wide  
181 recombination positions their collective location and LOH state were indicative of the position  
182 of the selectable transgene (HyTK or GFP), with the major difference being that under mitotic  
183 recombination or IVR, the critical interval was defined only on the centromeric side. While it  
184 would have been trivial to screen for additional lines to increase mapping resolution towards  
185 *GtRosa26*, we chose to further illustrate the potential of this approach by mapping naturally-  
186 occurring variations using IVR. One classical polymorphism is the 25 to 75-fold increased  
187 activity of the *Mus spretus* “a” allele of hypoxanthine-guanine phosphoribosyltransferase (*Hprt*<sup>a</sup>)  
188 compared to the laboratory mouse *Hprt*<sup>b</sup> allele (23). Importantly, HPRT metabolizes the anti-  
189 metabolite tioguanine (6-TG) and causes cytotoxicity. It should be noted that beside the known  
190 *Hprt* polymorphism, tioguanine susceptibility itself has not been previously mapped genetically  
191 within or between mouse species. Here, we expected ES cells carrying *Hprt*<sup>a</sup> to be highly  
192 susceptible to 6-TG treatment, whereas *Hprt*<sup>b/b</sup> or *Hprt*<sup>-/-</sup> ES cells should survive far higher 6-TG  
193 concentrations (Fig. 3–Figure Supplement 1). We set out to map the QTL for differential 6-TG  
194 susceptibility using a bulk segregant assay simply by comparing allele frequencies across the  
195 genome between pools of 6-TG susceptible and resistant ES cells as determined by flow  
196 cytometry. We called this procedure “flow mapping”, which takes advantage of a structured  
197 but genetically diverse population of cells in tissue culture (but also see “X-QTL” in yeast,  
198 {Ehrenreich 2010}).

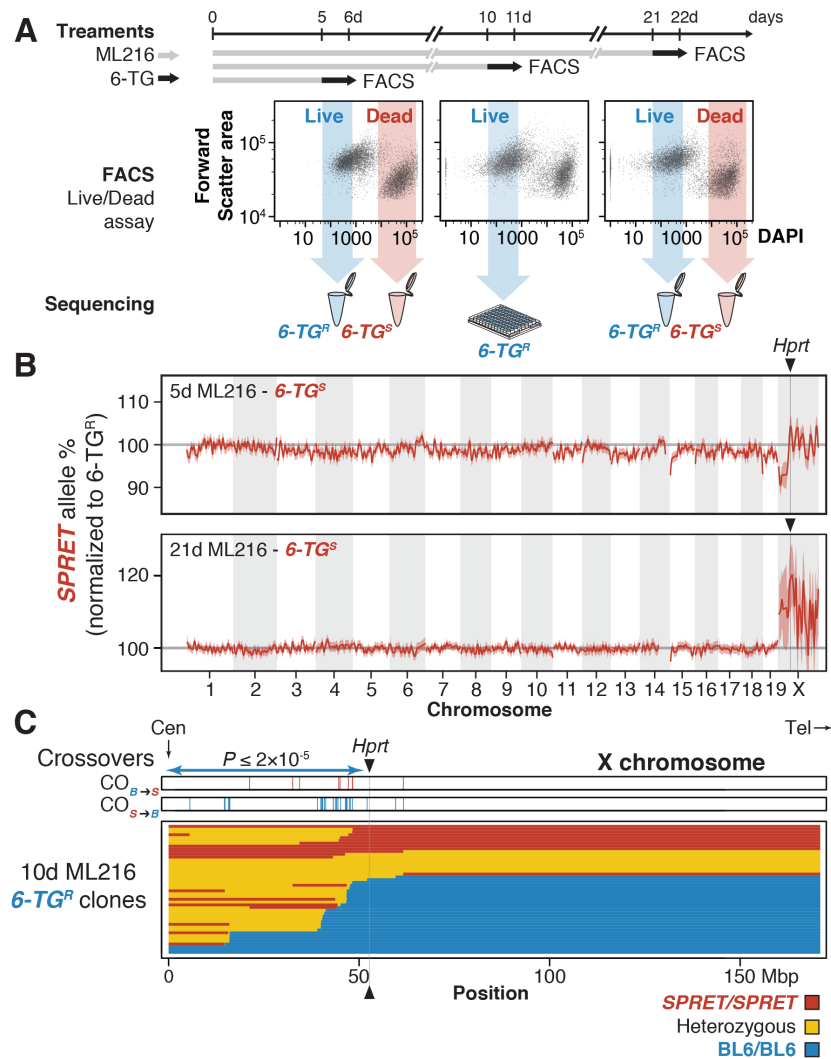

199 **Fig. 3. In vitro genetic mapping of variation in tioguanine susceptibility between divergent species.**  
 200

201 **(A)** A female ES cell line S18 derived from a *Mus spretus* and C57BL/6N F1 interspecific hybrid was  
 202 treated with ML216 (25  $\mu$ M) and subjected to the anti-metabolite tioguanine (6-TG) for 1d prior to  
 203 fluorescence-activated cell sorting (FACS). ES cells were evaluated for viability based on 4',6-diamidino-  
 204 2-phenylindole (DAPI) exclusion. Resistant and susceptible (6-TG<sup>R</sup> and 6-TG<sup>S</sup>) sub-populations were  
 205 gated conservatively (shaded arrows) and pooled for sequencing. Individual clones from the 10d ML216  
 206 treatment were cultured and whole genome sequenced. **(B)** Skewed allelic contributions between the 6-  
 207 TG<sup>R</sup> and 6-TG<sup>S</sup> pools suggested that the *SPRET* allele on Chromosome X conferred 6-TG susceptibility.  
 208 Allele frequencies were normalized against 6-TG<sup>R</sup> sample as an internal ML216 treatment control.  
 209 Plotted are per megabase mean *SPRET* allele frequencies  $\pm$  s.e.m. after 5 d and 21 d ML216 treatment.  
 210 In both cases, the genome-wide peak window contains the *Hprt* gene with the *SPRET* allele showing



211 significantly increased susceptibility. **(C)** Individual 6-TG<sup>r</sup> clones following 10 d ML216 treatment were  
212 sequenced to determine recombination breakpoints. Crossovers in clones surviving 6-TG treatment  
213 recombined significantly more likely in the *SPRET*-to-BL6 direction ( $S > B = 37$ ;  $B > S = 5$ ;  $P \leq 2 \times 10^{-5}$ )  
214 between the centromere and *Hprt*, consistent with strong selection favouring the BL6 *Hprt<sup>b</sup>* allele. In  
215 contrast, only 3 additional crossovers were detected telomeric to *Hprt*. At *Hprt*, most 6-TG surviving  
216 clones are homozygous for the *Hprt<sup>b</sup>* allele (27 vs. 9 heterozygotes and 10 *Hprt<sup>a</sup>* homozygotes).  
217

218 [Main Text cont'd]

219 We first confirmed the absence of chromosome-scale rearrangements between the  
220 parental strains that could preclude mapping using the *de novo* assembled genomes of the  
221 parental strains made available by the Wellcome Trust Sanger Institute (BL6 and SPRET/EiJ,  
222 abbreviated to *SPRET* here) (25, 26). We generated IVR panels by treating a female (BL6 x  
223 *SPRET*)F1 hybrid ES cell line (“S18”) (19) with ML216 over 5, 10 and 21 days (d; Fig. 3a). The  
224 use of a female ES cell line, which carried two active X chromosomes prior to the onset of X  
225 inactivation during differentiation (27), allowed direct selection on the alternative *Hprt*<sup>a</sup> and *Hprt*<sup>b</sup>  
226 alleles. After confirming biallelic *Hprt* expression in S18 cells using quantitative PCR, we  
227 treated control and IVR S18 cells with 6-TG and determined cell viability via a 4',6-diamidino-2-  
228 phenylindole (DAPI) exclusion assay. Damaged cells with ruptured membrane exhibited rapid  
229 uptake of DAPI, a feature unaffected by ML216 treatment, and were distinguishable by  
230 fluorescent-activated cell sorting (FACS; “Live” proportions under ML216 treatment vs. “Live”  
231 proportions under 6-TG treatment, n = 5 paired treatments; Kruskal-Wallis test,  $\chi^2 = 13.17$ ,  
232 d.f.= 1,  $P < 0.0003$ ; Fig. 3a; Fig. 3–Figure Supplement 2). We separately recovered and  
233 sequenced each “Resistant” (6-TG<sup>R</sup>) and “Susceptible” (6-TG<sup>S</sup>) pool (Fig. 3a). Under both 5d  
234 and 21d ML216 treatment, a large skew towards enriched *SPRET* coverage was observed on  
235 Chromosome X in the 6-TG<sup>S</sup> relative to the 6-TG<sup>R</sup> pool (Fig. 3a, b). This was in stark contrast to  
236 the genomic background, which showed little deviation from equal *SPRET* and BL6  
237 contributions (normalized *SPRET* coverage for Chromosome X: 1.10, 95% confidence interval:  
238 1.02–1.19; autosomes: 0.998, conf. int.: 0.986–1.01). The genome-wide peak *SPRET*  
239 enrichment window was found on Chromosome X, and it contained the *Hprt* gene itself  
240 (normalized *SPRET* coverage in 6-TG<sup>S</sup> pool, 1 Mbp window: 1.19, conf. int.: 1.09–1.28). Our  
241 results are consistent with the known role of *Hprt* in mediating 6-TG susceptibility and thus the  
242 gene underlying the QTL on Chromosome X. Here, our results through forward genetic

243 mapping for 6-TG susceptibility clearly identified a single locus, providing strong evidence that  
244 6-TG susceptibility depended only on *Hprt* genotypes. While flow mapping combined superior  
245 mapping resolution and experimental simplicity as a bulk experiment, recovery of individual  
246 clones could provide further proof through the recovery of specific recombination breakpoints  
247 confirming the role of *Hprt* in mediating differential 6-TG susceptibility and exclusion of  
248 alternative modes of resistance such as aneuploidy. To recover specific recombinant  
249 breakpoints, we also sequenced 46 individual 6-TG<sup>R</sup> IVR clones after 10d ML216 treatment (Fig.  
250 3c). Echoing the skewed crossovers patterns centromeric to the HyTK selection cassette (Fig.  
251 2b), we observed more *SPRET*-to-BL6 than BL6-to-*SPRET* recombinants (35 vs. 8,  $P \leq 2 \times 10^{-5}$ ,  
252 exact binomial test,  $h_1 \geq h_0$ ). We note, however, that despite the strongly skewed ratio of 27  
253 BL6/BL6 homozygous clones at the *Hprt* locus out of 46 total recovered clones, we still  
254 observed 9 heterozygotes and 10 *SPRET*/*SPRET* homozygous clones (BL6/BL6 58.6%; Chi-  
255 squared test using observed allele frequencies,  $\chi^2 = 13.17$ , d.f. = 2,  $P \leq 0.002$ ). This could be  
256 due to a quantitative, rather than absolute allelic difference in susceptibility to 25 $\mu$ M 6-TG  
257 treatment (Fig. 3–Figure Supplement 1); non-exclusive FACS gating based on DAPI exclusion;  
258 or other new mutation(s) at *Hprt* or elsewhere leading to 6-TG resistance (16). Taken together,  
259 we conclude that we were able to perform forward genetic mapping using IVR and recover *Hprt*  
260 as the gene underlying 6-TG susceptibility differences between BL6 and *SPRET*.

261

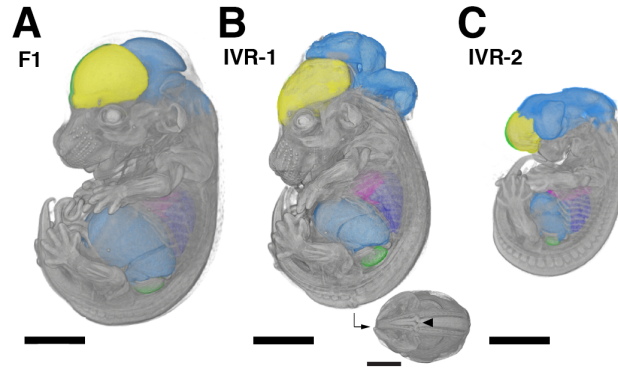

262  
263  
264 **Figure 4. Accessing developmental phenotypes in recombinants between evolutionarily divergent**  
265 **species.** Embryos at mid-gestation (14.5 d after fertilization) with nearly exclusive ES cell contribution  
266 were derived from non-recombinant F1 S18 ES cells **(A)** and IVR lines 1 **(B)** and 2 **(C)**. Embryos were  
267 dissected, contrast-stained and scanned using X-ray micro-computer tomography at 9.4  $\mu\text{m}$  resolution.  
268 The high scanning resolution allowed identification and precise measurements of individual organs  
269 (colorized here). Major developmental craniofacial and neural tube closure defects were observed in the  
270 IVR lines **(B)**, caudal view with arrowhead indicates neural tube lesion). Scale bar = 200  $\mu\text{m}$ .

271

272 [Main Text cont'd]

273 The ability to easily circumvent hybrid sterility in evolutionarily divergent murine species  
274 led us to ask what developmental phenotypes may arise from such otherwise inaccessible  
275 genetic configurations (*M. spretus*–laboratory mouse hybrid males are sterile, following  
276 Haldane’s rule). Backcrosses using female hybrids are possible but extremely challenging)(15).  
277 Assaying developmental phenotypes from evolutionarily divergent hybrid ES cells is non-trivial,  
278 because hybrid sterility blocks germ line transmission. Since conventional re-derivation of  
279 whole mice from ES cells depends on germ line transmission through an intermediate chimera  
280 generation, alternative methods that directly generate fully ES cell-derived mice would have to  
281 be used. Accordingly, we produced fully ES cell-derived founder animals using laser-assisted  
282 morula injection (28) with two karyotypically normal but genetically distinct IVR ES cell lines  
283 along with the reference, non-recombined S18 cells (IVR 1 and 2; Fig. 1–Figure Supplement 2;  
284 Fig. 4–Figure Supplement 1; Movies 1–3). We succeeded in obtaining multiple embryos per line  
285 at embryonic (E) 14.5d of development (n=36, 24 from IVR lines vs. n=9 untreated S18 line).  
286 Using high-resolution micro-computer tomography (microCT), we observed that the embryos  
287 from the untreated clones showed uniformly normal development, whereas embryos from both  
288 IVR lines ranged from showing normal development to dramatic craniofacial and neural tube  
289 closure defects (2 abnormal embryos out of 4 scanned embryos in IVR line 1; 2 out of 7 in line 2;  
290 and 0 out of 6 from the original S18 line; Fig. 4; Fig. 4–Figure Supplement 2; Movies 1–3).  
291 Neural tube and craniofacial defects are among the most common developmental defects due  
292 to the complex coordination of cell migration and cell–cell communications, which may be  
293 impaired due to novel genetic interactions between homozygosed loci in the IVR lines (Fig. 4–  
294 Figure Supplement 1). Future studies will focus on establishing firm genetic links to such  
295 defects. Besides major developmental defects, we also identified and obtain 3D  
296 measurements from specific organs, including sub-regions of the brain, the heart and the liver,

297 in multiple individuals from each ES cell line. Given an expanded panel of IVR ES lines, this  
298 approach illustrates the potential of characterizing, or even mapping, the genetic basis of  
299 evolutionary developmental variation. Despite the small sample size, our results show for the  
300 first time the feasibility and exciting opportunity to quantify and genetically map variation in  
301 developmental phenotypes in mammals using recombinants from evolutionarily divergent  
302 species.

303 A central goal of evolutionary genetics is to identify how mutations arose during  
304 evolution and influenced phenotypes. For many organisms, a major barrier has been the  
305 inability to reliably generate diverse and large mapping panels of sufficient evolutionary diversity.  
306 Here we describe a simple and robust method to make “*in vitro* crosses”, resulting in  
307 functionally intercross panels from otherwise sterile interspecific hybrid crosses. Being able to  
308 bring forth genetic diversity in a petri dish creates the unique opportunity to conduct mouse  
309 genetic mapping at unprecedented speeds with “flow mapping” (similar to “X-QTL” in yeast)  
310 (24) or arbitrarily large panels unmatched by most other model organisms, except possibly  
311 yeast (22, 24). As indefinitely renewable stem cell lines, IVR panels can be expanded, archived  
312 and shared, offering an arguably more feasible and cost-effective platform with many of the  
313 advantages sought from traditional community resources such as recombinant inbred line  
314 panels. Recently, Sadhu and coworkers have also achieved a major advance in genetic  
315 mapping using CRISPR/Cas9-mediated mitotic recombination in yeast (22). In contrast to  
316 CRISPR targeting, our transgene-free approach offers the simplicity of inducing genome-wide  
317 recombinants by the simple addition of a single inexpensive small molecule to the tissue culture  
318 medium. Further, we have shown that our IVR method works in a broad range of ES cells.  
319 With millions of potentially recombinant (thus genetically distinct) ES cells in a petri dish, we  
320 demonstrated how IVR enabled us to map a QTL for drug resistance in as few as 6 days (with  
321 an estimated total of 5 doublings over 5 days under ML216 treatment). Putting this in context,

322 such an experiment using traditional mouse crosses would have taken 450 days, based on the  
323 typical mouse generation time of 90 days, assuming that hybrid sterility could be overcome and  
324 allowing for selfing. Going forward, we envision a combined, complementary approach to IVR:  
325 using BLM inhibition for mapping panel generations and efficient QTL identification, then  
326 switching to targeted transgene-based screening or CRISPR/Cas9-based IVR for fine-scale  
327 mapping.

328         As a novel mapping system, we observed a number of key differences between IVR and  
329 conventional meiotic genetic mapping. First, loss-of-heterozygosity due to mitotic  
330 recombination tend to occur between the breakpoint and the telomeres. Unlike conventional  
331 breeding with random assortment, under IVR in F1 hybrids, outcrosses are not possible. As a  
332 result, we tend to observe only heterozygous genotypes near the centromere, with informative  
333 crossovers almost always found between the centromere and a selectable QTL but not on the  
334 telomeric side. This asymmetry often led to a plateau in the association profiles from the QTL  
335 towards the telomeres on a given chromosome (Fig. 2b and 3c), an effect also seen in (22). As  
336 a consequence, interval mapping in IVR analogous to those in meiotic panels yields excellent  
337 genetic resolution on the centromeric side but poor resolution on the telomeric side [see  
338 distribution of crossover directions and breakpoints in Fig. 3c and (22)]. Second, access to  
339 common tissue culture methods under IVR greatly mitigates typical concerns such as panel  
340 sizes and power calculation in generating meiotic mapping panels. Since it is trivial to freeze  
341 samples and introduce selectable markers at any given locus or targeted chromosome breaks  
342 with a Crispr/Cas9 panel (22) with ES cells under tissue culture conditions, refinement of  
343 mapping resolution under IVR no longer depends on the diminishing return of breeding and  
344 screening for increasingly rare informative recombinants. To underscore this point, our flow  
345 mapping experiment for 6-TG susceptibility achieved mapping resolutions within 10 Mbp within  
346 weeks. Third, while it is true that mitotic recombination as used in IVR depends on error-prone

347 repair of double-strand breaks that could affect phenotype through chromosome  
348 rearrangements and new mutations at breakpoints, two observations from our results may  
349 moderate this concern. One, we did not observe elevated aneuploidy under ML216 treatment,  
350 suggesting that IVR did not elevate rates of chromosome rearrangements (Fig. 1–Figure  
351 Supplement 2). Two, millions of variants already exist in our (BL6 x *CAST*) F1 or  
352 (BL6 x *SPRET*) F1 lines. These variants vastly outnumber any new mutations generated  
353 through IVR. Assuming a typical spectrum of mutation effects, these parental variants likely  
354 would contribute far more to trait variance than new mutations arising in a specific line. Since  
355 genetic mapping depends on testing for different genotypic effect of an allele across all lines  
356 carrying the same genotype at loci that are typically megabases away from a random double-  
357 strand breakpoint, it is reasonable to expect that the mutagenic effect of mitotic recombination  
358 should have a rather limited impact on genetic mapping. Under the flow mapping design, the  
359 mutagenic effect of mitotic recombination is further diluted, because millions, if not tens of  
360 millions of cells in bulk population cultures are phenotyped and sequenced as pools. This  
361 conclusion is supported by our ability to locate and map various transgenes or QTLs in this  
362 current study. We are nonetheless in the process to formally characterize the relative  
363 contribution to trait variation due to the mutagenic effects of IVR and that of the parental  
364 genomes.

365         Rather than thinking of IVR as a replacement of current genetic mapping methods, we  
366 see its establishment as an important extension to the existing toolkit that is complementary to  
367 whole organism methods. In the mouse, the largest organismal recombinant inbred (RI) panel  
368 BXD contains “only” ~160 lines (with most published work based on the ~35 original BXD  
369 strains)(29) and attempts in generating panels incorporating greater divergences encountered  
370 enormous challenges (30). Nevertheless, mouse RI resources still represented some of the  
371 most powerful tools available to dissect system genetics in the mouse, the prime biomedical



372 model organism (31). Seen in this light, the mouse community should encourage alternative  
373 approaches that could greatly extend the available renewable resources, even in a cellular or  
374 tissue context, not least because the genotype combinations between divergent species would  
375 have been hitherto impossible to obtain in the first place.

376         Given its potential for broad applications, we are currently making improvements to  
377 many aspects of *in vitro* recombination to make trait mapping of interspecific differences in  
378 mouse or other mammals routine. This includes improving the efficiency of IVR panel creation  
379 from hybrid cell lines and developing robust phenotyping protocols beyond the proof-of-  
380 concept experiments we have presented here. For example, we have already made  
381 refinements in IVR to screen for lines carrying recombination on multiple chromosomes (to be  
382 published separately). We are also performing detailed characterization on the location and  
383 distribution of recombination breakpoints to determine if certain genome features promote  
384 mitotic recombination (see possibly clustered breakpoints in Fig. 2b & 3c). In addition to the  
385 traits we have investigated, *Mus spretus* and the *Mus musculus* laboratory mouse differ in a  
386 number of distinct traits. Comprehensive genetic dissection of traits such as longevity and  
387 telomere lengths (32), cancer and inflammation resistance (33, 34) and metabolism (35), would  
388 be extremely useful. Many of these traits have tissue or cellular models that can be used in the  
389 context of IVR. For cellular traits that can be measured as fluorescent signals, either from  
390 immunohistochemistry staining of marker proteins or antigens, flow mapping would be readily  
391 applicable. Especially in the area of stem cell biology and genome functional genomics, the  
392 IVR platform opens up entire new possibilities for exploring how evolutionary divergence affects  
393 genome functions through expression QTL mapping, ChIP or ATAC-Seq and where applicable,  
394 flow mapping (and further fine mapping using Crispr-directed recombination as appropriate).  
395 At this stage, testing of specific genes discovered through the process via knock-in gene  
396 replacement as whole mice would serve as validation of the *in vitro* findings. For derivation of

397 whole mice from IVR lines, we acknowledge that our immediate attempt serves only to illustrate  
398 the possibility of obtaining whole animals from IVR genotypes, rather than a full-scale attempt  
399 at mapping developmental differences. It is important to stress that actual genetic mapping of  
400 developmental differences will require a much greater number of lines, ideally using improved,  
401 highly-recombinant IVR methods. Clearly, such a study will represent a major undertaking for  
402 single laboratories or small consortia. However, against the backdrop of systematic  
403 phenotyping performed on hundreds of lines in the mouse knock-out consortium, the costs and  
404 effort in screening a number of lines comparable to RI panels (around 35 lines) using IVR would  
405 not only be feasible, but also very likely to produce important results because it covers great  
406 evolutionary distances.

407 Future experiments may also probe even greater evolutionary divergence: early work  
408 has shown that F1 hybrids spanning as much as 6 million years between *Mus musculus* and  
409 *Mus caroli* was viable (36); or even human–mouse trans-chromosomal lines like *Tc1* (37).  
410 Further, given active development in single-cell genomics and disease modeling from patient-  
411 specific induced pluripotent stem cells (iPSC), especially with organoids or organ-on-a-chip  
412 microfluidics systems, we are optimistic that the *in vitro* recombinant platform can be broadly  
413 applied to mouse, human or even other species to accelerate the identification of the genetic  
414 basis of many traits and diseases.

#### 415 **References and Notes:**

- 416
- 417 1. C. Darwin, *On the Origin of Species by Means of Natural Selection* (John Murray, London, 1859).
- 418 2. L. Dejager, C. Libert, X. Montagutelli. (2009). Thirty years of *Mus spretus*: a promising future. *Trends*  
419 *Genet* **25**, 234-41. doi: 10.1016/j.tig.2009.03.007.
- 420 3. E. S. Lander, D. Botstein. (1989). Mapping mendelian factors underlying quantitative traits using RFLP  
421 linkage maps. *Genetics* **121**, 185-99.
- 422 4. T. F. C. Mackay, E. A. Stone, J. F. Ayroles. (2009). The genetics of quantitative traits: challenges and  
423 prospects. *Nat Rev Genet* **10**, 565-77.

- 424 5. H. Allen Orr.(2001). The genetics of species differences. *Trends Ecol Evolut* **16**, 343-50. doi:  
425 10.1016/S0169-5347(01)02167-X.
- 426 6. G. A. Churchill, D. C. Airey, H. Allayee, J. M. Angel, *et al.* (2004). The Collaborative Cross, a community  
427 resource for the genetic analysis of complex traits. *Nat Genet* **36**, 1133-7. doi: 10.1038/ng1104-1133.
- 428 7. J. Nicod, R. W. Davies, N. Cai, C. Hassett, *et al.* (2016). Genome-wide association of multiple complex  
429 traits in outbred mice by ultra-low-coverage sequencing. *Nat Genet* **48**, 912-8.
- 430 8. C. C. Parker, S. Gopalakrishnan, P. Carbonetto, N. M. Gonzales, E. Leung, Y. J. Park, E. Aryee, J.  
431 Davis, D. A. Blizard, C. L. Ackert-Bicknell, A. Lionikas, J. K. Pritchard, A. A. Palmer. (2016). Genome-wide  
432 association study of behavioral, physiological and gene expression traits in outbred CFW mice. *Nat*  
433 *Genet* **48**, 919-26.
- 434 9. A. Poltorak, X. He, I. Smirnova, M. Y. Liu, C. Van Huffel, X. Du, D. Birdwell, E. Alejos, M. Silva, C.  
435 Galanos, M. Freudenberg, P. Ricciardi-Castagnoli, B. Layton, B. Beutler. (1998). Defective LPS signaling  
436 in C3H/HeJ and C57BL/10ScCr mice: mutations in *Tlr4* gene. *Science* **282**, 2085-8.
- 437 10. O. Mihola, Z. Trachtulec, C. Vlcek, J. C. Schimenti, J. Forejt. (2009). A mouse speciation gene  
438 encodes a meiotic histone H3 methyltransferase. *Science* **323**, 373-5. doi: 10.1126/science.1163601.
- 439 11. L. M. Turner, M. A. White, D. Tautz, B. A. Payseur. (2014). Genomic networks of hybrid sterility. *PLoS*  
440 *Genet* **10**, e1004162. doi: 10.1371/journal.pgen.1004162.
- 441 12. M. A. White, M. Stubbings, B. L. Dumont, B. A. Payseur. (2012). Genetics and evolution of hybrid  
442 male sterility in house mice *Genetics* **191**, 917-34. doi: 10.1534/genetics.112.140251.
- 443 13. M. A. White, B. Steffy, T. Wiltshire, B. A. Payseur. (2011). Genetic dissection of a key reproductive  
444 barrier between nascent species of house mice. *Genetics* **189**, 289-304. doi:  
445 10.1534/genetics.111.129171.
- 446 14. J. Forejt. (1996). Hybrid sterility in the mouse. *Trends Genet* **12**, 412-7.
- 447 15. G. Burgio, M. Szatanik, J. L. Guénet, M. R. Arnau, J. J. Panthier, X. Montagutelli. (2007). Interspecific  
448 recombinant congenic strains between C57BL/6 and mice of the *Mus spretus* species: a powerful tool to  
449 dissect genetic control of complex traits. *Genetics* **177**, 2321-33. doi: 10.1534/genetics.107.078006.
- 450 16. G. Guo, W. Wang, A. Bradley. (2004). Mismatch repair genes identified using genetic screens in *Blm*-  
451 deficient embryonic stem cells. *Nature* **429**, 891-5. doi: 10.1038/nature02653.

- 452 17. K. Yusa, K. Horie, G. Kondoh, M. Kouno, Y. Maeda, T. Kinoshita, J. Takeda. (2004). Genome-wide  
453 phenotype analysis in ES cells by regulated disruption of *Bloom's syndrome* gene. *Nature* **429**, 896-9. doi:  
454 10.1038/nature02646.
- 455 18. A. Yamanishi, K. Yusa, K. Horie, M. Tokunaga, K. Kusano, C. Kokubu, J. Takeda. (2013).  
456 Enhancement of microhomology-mediated genomic rearrangements by transient loss of mouse *Bloom*  
457 *syndrome* helicase. *Genome Res* **23**, 1462-73. doi: 10.1101/gr.152744.112.
- 458 19. T. Hochepped, L. Schoonjans, J. Staelens, V. Kreemers, S. Danloy, L. Puimège, D. Collen, F. Van Roy,  
459 C. Libert. (2004). Breaking the species barrier: derivation of germline-competent embryonic stem cells  
460 from *Mus spretus* x C57BL/6 hybrids. *Stem Cells* **22**, 441-7.
- 461 20. G. Nguyen, T. Dexheimer, A. Rosenthal, W. Chu, D. Singh, G. Mosedale, C. Bachrati, L. Schultz, M.  
462 Sakurai, P. Savitsky, M. Abu, P. McHugh, V. Bohr, C. Harris, A. Jadhav, O. Gileadi, D. Maloney, A.  
463 Simeonov, I. Hickson. (2013). A Small molecule inhibitor of the *BLM* helicase modulates chromosome  
464 stability in human cells. *Chem Biol* **20**, 55-62. doi: 10.1016/j.chembiol.2012.10.016.
- 465 21. T. S. Barakat, E. Rentmeester, F. Sleutels, J. A. Grootegoed, J. Gribnau. (2011). Precise BAC  
466 targeting of genetically polymorphic mouse ES cells. *Nucleic Acids Res* **39**, e121. doi:  
467 10.1093/nar/gkr550.
- 468 22. M. J. Sadhu, J. S. Bloom, L. Day, L. Kruglyak. (2016). CRISPR-directed mitotic recombination  
469 enables genetic mapping without crosses. *Science* **352**, 1113-6.
- 470 23. G. G. Johnson, V. M. Chapman. (1987). Altered turnover of hypoxanthine phosphoribosyltransferase  
471 in erythroid cells of mice expressing *Hprt a* and *Hprt b* alleles. *Genetics* **116**, 313-20.
- 472 24. I. M. Ehrenreich, N. Torabi, Y. Jia, J. Kent, S. Martis, J. A. Shapiro, D. Gresham, A. A. Caudy, L.  
473 Kruglyak. (2010). Dissection of genetically complex traits with extremely large pools of yeast segregants.  
474 *Nature* **464**, 1039-42.
- 475 25. Genome Evaluation Browser, SPRET\_EiJ. ([http://mice-  
476 geval.sanger.ac.uk/SPRET\\_EiJ\\_R20150909/Info/Index](http://mice-geval.sanger.ac.uk/SPRET_EiJ_R20150909/Info/Index); Accessed: January 26, 2017)
- 477 26. T. M. Keane, L. Goodstadt, P. Danecek, M. A. White, K. Wong, B. Yalcin, A. Heger, A. Agam, G.  
478 Slater, M. Goodson. (2011). Mouse genomic variation and its effect on phenotypes and gene regulation.  
479 *Nature* **477**, 289-94.

- 480 27. T. S. Barakat, J. Gribnau. (2010). X chromosome inactivation and embryonic stem cells. *Adv Exp Med*  
481 *Biol* **695**, 132-54. doi: 10.1007/978-1-4419-7037-4\_10.
- 482 28. T. M. DeChiara, W. T. Poueymirou, W. Auerbach, D. Friendewey, G. D. Yancopoulos, D. M. Valenzuela.  
483 (2010). Producing fully ES cell-derived mice from eight-cell stage embryo injections. *Methods Enzymol*  
484 **476**, 285-94.
- 485 29. R. W. Williams, E. G. Williams. (2017). Resources for Systems Genetics. *Methods Mol Biol* **1488**, 3-29.  
486 doi: 10.1007/978-1-4939-6427-7\_1.
- 487 30. Collaborative Cross Consortium.(2012). The genome architecture of the Collaborative Cross mouse  
488 genetic reference population. *Genetics* **190**, 389-401. doi: 10.1534/genetics.111.132639.
- 489 31. P. A. Andreux, E. G. Williams, H. Koutnikova, R. H. Houtkooper, M. F. Champy, H. Henry, K.  
490 Schoonjans, R. W. Williams, J. Auwerx. (2012). Systems genetics of metabolism: the use of the BXD  
491 murine reference panel for multiscale integration of traits. *Cell* **150**, 1287-99. doi:  
492 10.1016/j.cell.2012.08.012.
- 493 32. H. Ding, M. Schertzer, X. Wu, M. Gertsenstein, S. Selig, M. Kammori, R. Pourvali, S. Poon, I. Vulto, E.  
494 Chavez, P. P. L. Tam, A. Nagy, P. M. Lansdorp. (2004). Regulation of murine telomere length by *Rtel*: an  
495 essential gene encoding a helicase-like protein. *Cell* **117**, 873-86.
- 496 33. T. Mahieu, J. M. Park, H. Revets, B. Pasche, A. Lengeling, J. Staelens, A. Wullaert, I. Vanlaere, T.  
497 Hochepped, F. van Roy, M. Karin, C. Libert. (2006). The wild-derived inbred mouse strain SPRET/Ei is  
498 resistant to LPS and defective in *IFN-β* production. *Proc Natl Acad Sci U S A* **103**, 2292-7.
- 499 34. L. Puimège, F. Van Hauwermeiren, S. Steeland, S. Van Ryckeghem, J. Vandewalle, S. Lodens, L.  
500 Dejager, S. Vandevyver, J. Staelens, S. Timmermans, R. E. Vandenbroucke, C. Libert. (2015).  
501 Glucocorticoid-induced *microRNA-511* protects against *TNF* by down-regulating *TNFR1*. *EMBO Mol*  
502 *Med* **7**, 1004-17.
- 503 35. Y. Song, S. Endepols, N. Klemann, D. Richter, F. -R. Matuschka, C. -H. Shih, M. W. Nachman, M. H.  
504 Kohn. (2011). Adaptive introgression of anticoagulant rodent poison resistance by hybridization between  
505 old world mice. *Curr Biol* **21**, 1296-301. doi: 10.1016/j.cub.2011.06.043.
- 506 36. J. D. West, W. I. Frels, V. E. Papaioannou, J. P. Karr, V. M. Chapman. (1977). Development of  
507 interspecific hybrids of *Mus*. *J Embryol Exp Morphol* **41**, 233-43.

- 508 37. A. O'Doherty, S. Ruf, C. Mulligan, V. Hildreth, M. L. Errington, S. Cooke, A. Sesay, S. Modino, L.  
509 Vanes, D. Hernandez, J. M. Linehan, P. T. Sharpe, S. Brandner, T. V. P. Bliss, D. J. Henderson, D. Nizetic,  
510 V. L. J. Tybulewicz, E. M. C. Fisher. (2005). An aneuploid mouse strain carrying human chromosome 21  
511 with Down syndrome phenotypes. *Science* **309**, 2033-7. doi: 10.1126/science.1114535.
- 512 **Citation from Materials and Methods only:**
- 513 38. E. T. Wong, J. L. Kolman, Y. -C. Li, L. D. Mesner, W. Hillen, C. Berens, G. M. Wahl. (2005).  
514 Reproducible doxycycline-inducible transgene expression at specific loci generated by *Cre*-recombinase  
515 mediated cassette exchange. *Nucleic Acids Res* **33**, e147.. doi: 10.1093/nar/gni145.
- 516 39. L. Haenebalcke, S. Goossens, M. Naessens, N. Kruse, M. Farhang Ghahremani, S. Bartunkova, K.  
517 Haigh, T. Pieters, P. Dierickx, B. Drogat, O. Nyabi, D. Wirth, J. J. Haigh. (2013). Efficient *ROSA26*-based  
518 conditional and/or inducible transgenesis using RMCE-compatible F1 hybrid mouse embryonic stem  
519 cells. *Stem Cell Rev* **9**, 774-85. doi: 10.1007/s12015-013-9458-z.
- 520 40. M. Xue, B. V. Atallah, M. Scanziani. (2014). Equalizing excitation-inhibition ratios across visual cortical  
521 neurons. *Nature* **511**, 596-600. doi: 10.1038/nature13321.
- 522 41. J. Schindelin, I. Arganda-Carreras, E. Frise, V. Kaynig, M. Longair, T. Pietzsch, S. Preibisch, C.  
523 Rueden, S. Saalfeld, B. Schmid, J. -Y. Tinevez, D. J. White, V. Hartenstein, K. Eliceiri, P. Tomancak, A.  
524 Cardona. (2012). Fiji: an open-source platform for biological-image analysis. *Nat Methods* **9**, 676-82. doi:  
525 10.1038/nmeth.2019.
- 526 42. P. Danecek, A. Auton, G. Abecasis, C. A. Albers, E. Banks, M. A. DePristo, R. E. Handsaker, G.  
527 Lunter, G. T. Marth, S. T. Sherry, G. McVean, R. Durbin, 1000 Genomes Project Analysis Group. (2011).  
528 The variant call format and VCFtools. *Bioinformatics* **27**, 2156-8. doi: 10.1093/bioinformatics/btr330.
- 529 43. M. Schuelke. (2000). An economic method for the fluorescent labeling of PCR fragments. *Nat*  
530 *Biotechnol* **18**, 233-4. doi: 10.1038/72708.
- 531 44. M. Kearse, R. Moir, A. Wilson, S. Stones-Havas, M. Cheung, S. Sturrock, S. Buxton, A. Cooper, S.  
532 Markowitz, C. Duran, T. Thierer, B. Ashton, P. Meintjes, A. Drummond. (2012). Geneious Basic: an  
533 integrated and extendable desktop software platform for the organization and analysis of sequence data.  
534 *Bioinformatics* **28**, 1647-9. doi: 10.1093/bioinformatics/bts199.
- 535 45. F. Hahne, N. LeMeur, R. R. Brinkman, B. Ellis, P. Haaland, D. Sarkar, J. Spidlen, E. Strain, R.

- 536 Gentleman. (2009). flowCore: a Bioconductor package for high throughput flow cytometry *BMC*  
537 *Bioinformatics* **10**, 1. doi: 10.1186/1471-2105-10-106.
- 538 46. C. Fraley, A. E. Raftery. (2002). Model-based clustering, discriminant analysis, and density estimation  
539 *J Am Stat Assoc.* **97**, 611-31.
- 540 47. C. Fraley. (2012). mclust Version 4 for R: Normal Mixture Modeling for Model-Based Clustering,  
541 Classification, and Density Estimation *University of Washington: Seattle* .
- 542 48. B. Ellis, R. Gentleman, F. Hahne, N. L. Meur, D. Sarkar. (2016). flowViz: Visualization for flow  
543 cytometry. *R package version 1.36.2* .
- 544 49. P. Chomczynski, N. Sacchi. (1987). Single-step method of RNA isolation by acid guanidinium  
545 thiocyanate-phenol-chloroform extraction. *Anal Biochem* **162**, 156-9. doi: 10.1006/abio.1987.9999.
- 546 50. P. B. Campos, R. C. Sartore, S. N. Abdalla, S. K. Rehen. (2009). Chromosomal spread preparation of  
547 human embryonic stem cells for karyotyping. *J Vis Exp*. doi: 10.3791/1512.
- 548 51. S. Picelli, A. K. Björklund, B. Reinius, S. Sagasser, G. Winberg, R. Sandberg. (2014). *Tn5* transposase  
549 and tagmentation procedures for massively scaled sequencing projects. *Genome Res* **24**, 2033-40. doi:  
550 10.1101/gr.177881.114.
- 551 52. FastQC. (<http://www.bioinformatics.babraham.ac.uk/projects/fastqc/>; Accessed: August 5, 2016).
- 552 53. A. M. Bolger, M. Lohse, B. Usadel. (2014). Trimmomatic: a flexible trimmer for Illumina sequence data.  
553 *Bioinformatics* **30**, 2114-20. doi: 10.1093/bioinformatics/btu170.
- 554 54. H. Li, R. Durbin. (2010). Fast and accurate long-read alignment with Burrows-Wheeler transform.  
555 *Bioinformatics* **26**, 589-95. doi: 10.1093/bioinformatics/btp698.
- 556 55. A. McKenna, M. Hanna, E. Banks, A. Sivachenko, K. Cibulskis, A. Kernytsky, K. Garimella, D.  
557 Altshuler, S. Gabriel, M. Daly, M. A. DePristo. (2010). The Genome Analysis Toolkit: a MapReduce  
558 framework for analyzing next-generation DNA sequencing data. *Genome Res* **20**, 1297-303. doi:  
559 10.1101/gr.107524.110.
- 560 56. M. A. DePristo, E. Banks, R. Poplin, K. V. Garimella, J. R. Maguire, C. Hartl, A. A. Philippakis, G. del  
561 Angel, M. A. Rivas, M. Hanna, A. McKenna, T. J. Fennell, A. M. Kernytsky, A. Y. Sivachenko, K. Cibulskis,  
562 S. B. Gabriel, D. Altshuler, M. J. Daly. (2011). A framework for variation discovery and genotyping using  
563 next-generation DNA sequencing data. *Nat Genet* **43**, 491-8. doi: 10.1038/ng.806.



- 564 57. H. Li, B. Handsaker, A. Wysoker, T. Fennell, J. Ruan, N. Homer, G. Marth, G. Abecasis, R. Durbin,  
565 1000 Genome Project Data Processing Subgroup. (2009). The Sequence Alignment/Map format and  
566 SAMtools. *Bioinformatics* **25**, 2078-9. doi: 10.1093/bioinformatics/btp352.
- 567 58. H. Li. (2011). A statistical framework for SNP calling, mutation discovery, association mapping and  
568 population genetical parameter estimation from sequencing data. *Bioinformatics* **27**, 2987-93. doi:  
569 10.1093/bioinformatics/btr509.
- 570 59. "Multiallelic calling model in bcftools (-m)." (<https://samtools.github.io/bcftools/call-m.pdf>. Accessed  
571 26.Jan.2017.).
- 572 60. R. C. Team. (2015). R: A language and environment for statistical computing *R: A language and*  
573 *environment for statistical computing* .
- 574 61. B. A. Rowan, V. Patel, D. Weigel, K. Schneeberger. (2015). Rapid and inexpensive whole-genome  
575 genotyping-by-sequencing for crossover localization and fine-scale genetic mapping. *G3 (Bethesda)* **5**,  
576 385-98. doi: 10.1534/g3.114.016501.

577

## 578 **Acknowledgements**

579 We thank Felicity Jones for experimental design, helpful discussion and input, and for  
580 improving the manuscript. We thank Caroline Schmid for animal husbandry. We thank  
581 Sebastian Kick for help with microCT scanning. We thank the Chan and Jones Labs members  
582 for support, insightful scientific discussion and improving the manuscript. We thank Derek  
583 Lundberg for help with library preparation automation. We thank Christa Lanz, Rebecca  
584 Schwab and Ilja Bezrukov for assistance with high-throughput sequencing and associated data  
585 processing; Andre Noll for high-performance computing support; Cornelia Grimm and Stella  
586 Autenrieth for technical assistance with FACS; the MPI Tübingen I.T. team for computational  
587 support. We thank Rémi Blanc at FEI for assistance and support with 3D image analysis. RV-  
588 L3-HyTK-2L was a gift from Geoff Wahl (Addgene plasmid # 11684). pCAG-Flpo was a gift  
589 from Massimo Scanziani (Addgene plasmid # 60662). pBSII-IFP2-ORF was a gift from Nancy



590 Craig. The AB2.2 ES cell line was a gift from Allan Bradley. The G4 ROSALUC ES cell line was  
591 a gift from Jody J. Haigh. We thank Hua Tang, David M. Kingsley, Karsten Borgwardt and  
592 Detlef Weigel for input and discussion on experimental design. J.P.L.C. is supported by the  
593 International Max Planck Research School “From Molecules to Organisms”. P.M. was  
594 supported by the Fulbright US Student Program. T.H. and C.L. are supported by Ghent  
595 University. Y.F.C. is supported by the Max Planck Society and a European Research Council  
596 Starting Grant #639096 “HybridMiX”.

### 597 **Author Contributions**

598 Y.F.C. conceived the IVR strategy. M.N.C.F. and Y.F.C. designed the original experiments. S.L.  
599 and Y.F.C. developed the flow mapping strategy. S.L., and M.K. designed and perform the cell  
600 culture and sequencing experiments and analyzed the data. S.L. and J.P.L.C. performed cell  
601 culture experiments, screening for recombinants. P.M., M.N.C.F. and R.W. designed the  
602 original pilot experiments on the IVR strategy and performed the experiments. Y.F.C., S.L., and  
603 R.N. planned and performed the morula injection experiment and analyzed the data. J.G., T.H.,  
604 C.L. provided critical ES cell lines. S.L., M.K., J.P.L.C., R.N., R.W., J.G., T.H., C.L. and Y.F.C.  
605 wrote the manuscript. All authors discussed the results and implications and commented on  
606 the manuscript at all stages.

### 607 **Competing Financial Interests**

608 The authors declare no competing interests. The Max Planck Society and the ERCEA  
609 provide funding for the research but no other competing interests.

## 610 **Materials and Methods:**

### 611 *Animal Care and Use*

612 All experimental procedures described in this study have been approved by the applicable University  
613 institutional ethics committee for animal welfare at the Faculty of Sciences, Ghent University, Belgium,  
614 (reference number 06/022); or local competent authority: Landesdirektion Sachsen, Germany, permit  
615 number 24-9168.11-9/2012-5.

### 616 617 *Reference genome assembly*

618 All co-ordinates in the mouse genome refer to *Mus musculus* reference mm10, which is derived from  
619 GRCm38. Sequence data have been deposited in the GEO database under accession number [X].

### 620 621 *Cell Culture*

622 All ES cell lines used in this study are summarized in Table S1.

623 Unless otherwise stated, murine stem cell lines have been cultured on Attachment Factor Protein (AF)  
624 (ThermoFisherScientific, Schwerte, Germany) coated cell culture dishes on inactivated SNL 76/7-4 feeder  
625 cells (“feeder” plates; SCRC-1050, ATCC, Middlesex, United Kingdom) and using 2i/LIF media as follows:  
626 KnockOut Serum Replacement (ThermoFisherScientific), KnockOut DMEM (ThermoFisherScientific), 2-  
627 Mercaptoethanol, 1000x, 55 mM (ThermoFisherScientific); MEM Non-Essential Amino Acids Solution,  
628 100x (ThermoFisherScientific); GlutaMAX Supplement, 100x (ThermoFisherScientific); 3  $\mu$ M GSK-3  
629 inhibitor CHIR99021 (Sigma–Aldrich, Munich, Germany); 1  $\mu$ M MEK inhibitor PD0325901 (Sigma–Aldrich);  
630 insulin solution, human (Sigma–Aldrich), 1000 U/mL recombinant mouse LIF (expressed in-house).  
631 Unless otherwise stated, cell culture media was replaced daily.

### 632 633 *BLM inhibition using ML216*

634 BLM inhibition was performed using 25  $\mu$ M ML216 (Sigma–Aldrich) in 2i/LIF media on inactivated feeders.  
635 Killing curve for ML216 was performed using the WST-1 assay (Roche, Basel, Switzerland) according to  
636 the manufacturer’s instructions.

### 637 638 *Plasmid construction*

639 The pMK11 plasmid was constructed by blunt-end ligation of the pRMCE-DV1 plasmid’s backbone, after  
640 excision of its chloramphenicol-*ccdB* cassette between the EcoRV and SbfI sites, and replacing it with  
641 the HindIII-excised hygromycin phosphotransferase-thymidine kinase cassette (HyTK) from the RV-L3-  
642 HyTK-2L plasmid (38) (Plasmid # 11684, Addgene, Cambridge, USA). The final pMK11 construct  
643 contained flanking *FRT wt* and *FRT mutant* sites for recombinase-mediated cassette exchange detailed  
644 below.

### 645 646 *Generation of HyTK-EGFP-Neo cell line*

647 G4 ROSALUC B12 ES cells (39) were co-transfected with pMK11 described above and *FLP* mRNA  
648 (StemMACS *Fip* Recombinase, Miltenyi Biotec, Bergisch Gladbach, Germany) or pCAG-*Fip*o (40)  
649 (Plasmid # 60662, Addgene) using Lipofectamine 2000 (ThermoFisherScientific). We replaced the  
650 cassette at the *GtRosa26* locus with a cassette carrying two selectable markers, HyTK and enhanced  
651 green fluorescent protein (EGFP, selectable in fluorescence-assisted cell sorting; Fig. 1–Figure  
652 Supplement 1). Successful replacement of the cassette with a re-activated neomycin resistance gene  
653 was selected for with 200  $\mu$ g/mL geneticin (G148; ThermoFisherScientific). Resistant colonies were  
654 picked after 7 days (d) of selection and further expanded. Correct replacement was confirmed by  
655 junction PCR with primers SA\_loxP\_Rev: 5’–GCGGCCTCGACTCTACGATA–3’ and  
656 ROSA26\_3HA\_F\_BamHI: 5’–GCGGGATCCCCTCGTGATCTGCAACTCC–3’. The presence of an intact  
657 BL6 wildtype allele was confirmed by an alternative reverse primer oIMR8545 5’–  
658 AAAGTCGCTCTGAGTTGTTA–3’. PCR was performed as a quantitative PCR reaction. See “RNA  
659 Extraction, Reverse Transcription and “Real Time PCR” section below for more details.

### 660 661 *Colony Survival Assay*

662 HyTK-EGFP-Neo cells were seeded at a density of  $5 \times 10^5$  per 10 cm AF/feeder plate. Eight hours (h)  
663 following the plating, 25  $\mu$ M ML216 treatment was initiated and continued for 1 or 5 d. Prior to the start

664 of negative selection, cells were re-plated at  $2 \times 10^5$  per 10cm AF/feeder plate and FIAU (0.2  $\mu\text{M}$ , Sigma-  
665 Aldrich) or ganciclovir (10  $\mu\text{M}$ , Sigma-Aldrich) selection was initiated after 1 d and continued for 5 d.  
666 In order to determine the plating efficiency after ML216 treatment, cells were plated at  $1 \times 10^3$  per 6 cm  
667 AF/feeder dish. Colonies were stained with the Alkaline phosphatase kit (EMD Millipore, Billerica, MA,  
668 USA). Before the application of negative selection, 20 random views of each plate were taken using an  
669 EVOS FL Cell Imaging System (ThermoFisherScientific) and counted using Fiji v2.0.0-rc-  
670 54/1.51h (41).

671  
672 *Screening for spontaneous recombinant ES cell colonies*

673 Cells were plated at a density of  $1 \times 10^5$  per 3.5 cm AF plate. Treatment with 5  $\mu\text{M}$  ML216 was initiated 16  
674 h after plating, continued for 2 d and then followed by 3 d of 25  $\mu\text{M}$  ML216 treatment. Cells were then  
675 re-plated on a 10 cm AF plate and cultured for 5 d in 2i/LIF without ML216. Two hundred colonies were  
676 randomly picked, and 153 were expanded for multiplexed genotyping.

677  
678 *Multiplexed genotyping for detection of loss-of-heterozygosity (LOH)*

679 Diagnostic insertions or deletions (indels) between BL6, CAST and SPRET strains that are greater than  
680 20bp in length and located within the most distal 10Mbp of each chromosome were filtered from the  
681 publicly available variant panel from the Mouse Genomes Project made available by the Wellcome Trust  
682 Sanger Centre (v5 dbSNP v142 release) (19) using VCFtools v0.1.14 (42). Automated primer  
683 design was carried out with Primer3 v.1.1.3 using the following parameters: PRIMER\_OPT\_SIZE=20;  
684 PRIMER\_MIN\_SIZE=18; PRIMER\_PRODUCT\_OPT\_SIZE=300 PRIMER\_PRODUCT\_SIZE\_RANGE=250-  
685 400 PRIMER\_MAX\_SIZE=23 PRIMER\_NUM\_NS\_ACCEPTED=1 PRIMER\_LEFT\_MIN\_TM=58  
686 PRIMER\_LEFT\_MAX\_TM=62 PRIMER\_RIGHT\_MIN\_TM=58 PRIMER\_RIGHT\_MAX\_TM=62  
687 PRIMER\_MAX\_DIFF\_TM=2 PRIMER\_MIN\_GC=45.0 PRIMER\_MAX\_GC=85.0 PRIMER\_MAX\_POLY\_X=3  
688 PRIMER\_SELF\_ANY=4. Among indels with successfully designed primer pairs, the most telomeric  
689 amplicons were chosen, and an extension was added to either the forward (M13F) or reverse (M13R-46)  
690 oligonucleotide to allow for easy fluorophore incorporation as described in (43). The amplicon sizes were  
691 further optimized following pilot capillary sequencer runs to avoid amplicon size overlap in a multiplexed  
692 run. All primers and expected fragment sizes are listed in Supp. Table 2. For genotyping of cell colonies,  
693 primers pairs were pooled into 4 multiplexed PCR reactions. Group 1 (Chr1, Chr7, Chr13, Chr14 and  
694 Chr18) and Group 2 (Chr3, Chr6, Chr16, Chr17 and Chr19) primer mixes contained 2 and 4  $\mu\text{M}$  of forward  
695 and reverse primers, respectively, for each listed chromosome plus 20  $\mu\text{M}$  of the universal FAM-labeled  
696 M13F\_FAM primer. Chromosomes 13 and 17 primers were mixed at 6 and 12  $\mu\text{M}$  concentration. For  
697 Group 3 (Chr2, Chr4, Chr5, Chr11, ChrX) and Group 4 (Chr8, Chr9, Chr10, Chr12, Chr15) mixes, the  
698 forward and reverse primers were mixed at 4 and 2  $\mu\text{M}$  concentration, along with the HEX-labelled  
699 M13R-46\_HEX primer at a concentration of 20  $\mu\text{M}$ . QIAGEN Multiplex PCR Plus Kit (Qiagen, Hilden,  
700 Germany) was used according to manufacturer's recommendations (including the addition of 5 $\times$  Q-  
701 Solution) at 10  $\mu\text{L}$  final reaction volume with 3 to 10 ng of DNA per PCR reaction. The PCR program  
702 used was: 95  $^{\circ}\text{C}$  for 15 min, then 52 cycles of 94  $^{\circ}\text{C}$  for 30 s; Group-specific annealing temperature for  
703 2.5 min; and 72  $^{\circ}\text{C}$  for 1 min; followed by a final extension at 72  $^{\circ}\text{C}$  for 30 min and hold at 4  $^{\circ}\text{C}$ . The  
704 group-specific annealing temperatures were: Group 1: 63  $^{\circ}\text{C}$ ; Group 2: 63.8  $^{\circ}\text{C}$ ; Group 3: 57  $^{\circ}\text{C}$ ; and  
705 Group 4: 64  $^{\circ}\text{C}$ . Then the PCR reactions were pooled at equal 1  $\mu\text{L}$  proportions and analyzed with a  
706 3730xl DNA Analyzer capillary sequencer (ThermoFisher Scientific, Germany) using the fragment analysis  
707 program with the G5-RCT Dye Set. Electropherogram traces were analyzed with the Microsatellite  
708 Plugin in Geneious v7.1.9 (44).

709  
710 *6-TG treatment and DAPI exclusion assay*

711 Prior to the main experiments, killing curves for 6-thioguanine (Sigma-Aldrich) was performed using WST-  
712 1 assay (Roche) according to the manufacturer's instructions (Fig. 3-Figure Supplement 1). For the main  
713 experiments, S18 ES cell line was cultured for 5, 10 or 21 d with 25  $\mu\text{M}$  ML216 prior the treatment with  
714 25  $\mu\text{M}$  6-TG in 2i/LIF starting from an initial seeding concentration of  $1 \times 10^5$  cell per 3.5 cm AF plate. To  
715 avoid overcrowding, at day 3 of the ML216 treatment colonies were dissociated using Accutase Cell  
716 Dissociation Reagent (ThermoFisherScientific) and re-seeded on a 10 cm AF-plate while continuing  
717 ML216 treatment. At day 5, the cells were moved to a 15 cm AF plate prior to 6-TG treatment. After 16 h,  
718 6-TG in 2i/LIF was added at a concentration of 25  $\mu\text{M}$ . From each plate  $2.5 \times 10^4$  cells were used to

719 continue the experiment until day 10 or 21. 4',6-diamidino-2-phenylindole (DAPI) staining (1 µg/mL,  
720 Sigma–Aldrich) was employed for “live/dead” cell viability determination after 1 d of 25 µM 6-TG  
721 treatment. Briefly, ES cells were treated with ML216 and/or 6-TG to induce IVR and cell death,  
722 respectively. Colonies were dissociated using Accutase and re-suspended in phosphate buffered saline  
723 (PBS) within 1 h of analytical or preparative fluorescence-activated cell sorting (FACS). For details on  
724 FACS see below.

725

#### 726 *Fluorescence-Activated Cell Sorting (FACS)*

727 Flow cytometry was performed at the University Clinic Tübingen Dermatology Clinic FACS Core Facility  
728 using an Aria II Cell Sorter (Becton Dickinson GmbH, Heidelberg, Germany). To determine cell viability,  
729 we performed the DAPI exclusion assay. After excluding cell aggregates, we defined the 6-TG<sup>R</sup> and 6-  
730 TG<sup>S</sup> populations using conservative interval gates based on evaluating the data from reference flow  
731 experiments with 6-TG-treated DAPI-stained ES cells. For cell population evaluations, flow cytometry  
732 data was exported from BD FACSDiva Software v8.0.1 (Becton Dickinson). We carried out basic  
733 data handling and log<sub>10</sub> transformation using the R Bioconductor package flowCore (45). Since live  
734 and dead cells cluster also in other measurements, we took both forward scatter area (FSC-A) and DAPI  
735 into account for our quantification, rather than using a simple interval gate on the DAPI/Pacific Blue-A  
736 channel. We defined data-driven “Live” and “Dead” clusters using mclust v5.2 (46, 47) in 6-TG-  
737 treated experiments, considering ML216-treated and controls separately. We then classified each cell in  
738 to the “Live” and “Dead” clusters, applying a 5% uncertainty cut-off. “Live” and “Dead” proportions  
739 were then calculated from the confidently assigned cells. Data was visualized using the package  
740 flowViz (48) (Fig. 3–Figure Supplement 2).

741

#### 742 *RNA Extraction, Reverse Transcription, and Real Time PCR*

743 RNA was isolated using TRIzol Reagent (ThermoFisherScientific) with a single-step method  
744 following (49). Complementary DNA (cDNA) was generated using High-Capacity cDNA Reverse  
745 transcription kit (ThermoFisherScientific) with 500 ng of RNA per reaction according to the  
746 manufacturer’s instructions. The newly synthesized cDNA (20 µl reaction) was diluted 5 fold and  
747 quantitative PCR (qPCR) was performed with SYBR-select Master Mix for CFX (ThermoFisherScientific)  
748 using a CFX384 Real-Time PCR system instrument (BioRad, Munich, Germany). We used the following  
749 primers for allele-specific amplification and detection: *Hprt<sup>a</sup>* (*SPRET*) forward: 5’-  
750 CAAAGCCTAAGAGCATGAGCGC-3’, reverse: 5’-CAGAGGGAAGCTGATAGGCTGGC-3’, amplicon size:  
751 229bp; *Hprt<sup>b</sup>* (BL6) forward: 5’-GCCAAATACAAAGCCTAAGATGAGCG-3’, reverse: 5’-  
752 CCAGCCTACCTCTGGTAGATTG-3’, amplicon size: 236bp. The standard CFX mode for T<sub>m</sub> ≥ 60 °C  
753 was used, with the following thermocycling program: 50 °C for 2 min, 95 °C for 2 min, followed by 35  
754 cycles of 95 °C for 15 s, 60 °C for 1 min. Melting curve analysis over 80 steps of 0.5 °C increments was  
755 performed and curves inspected to ensure uniform annealing.

756

#### 757 *Immunofluorescence staining*

758 ES cells were cultured for 3 d on 12 mm cover glasses pre-coated with AF and feeder layer. Cells were  
759 then fixed 10 min in 4% paraformaldehyde, permeabilized 10 min in 0.25% Triton X, blocked in 5%  
760 serum for 1 h at room temperature. ES cell colonies were stained with anti-*Nanog* (1:100, rabbit, Cat #  
761 ab80892, Abcam, Cambridge, UK) antibodies for 2 h at room temperature and conjugated secondary  
762 antibody (1:400, anti-rabbit Alexa 467) for 1 h at room temperature. Nuclei were counter-stained for 5  
763 min with DAPI at 1 µg/mL, mounted with ProLong Diamond Antifade Mountant (ThermoFisherScientific)  
764 and imaged using an AXIOVERT 200M inverted microscope (Zeiss, Oberkochen, Germany)

765

#### 766 *Karyotyping*

767 Metaphase spreads were prepared from Control and ML216-treated ES cells under 2i conditions (5 d  
768 culture for treatment on the original S18 background, 2 d for the IVR lines 1 and 2; see Cell Culture above  
769 for a detailed description of culturing conditions). Metaphase spreads were prepared essentially as  
770 described in (50) with the following modifications. Cells were initially plated at a density of 2×10<sup>5</sup> cells  
771 per 10 cm AF-coated culture dish. Spreads were mounted with ProLong Diamond Antifade Mountant  
772 (ThermoFisherScientific). Metaphase chromosomes were imaged with a 63x objective in a Zeiss  
773 APOTOME AXIO Imager.Z1 (Zeiss) equipped with an Orca-flash4.0 digital camera (C11440-22CU,

774 Hamamatsu, Herrsching am Ammersee, Germany) and coupled to HImage v4.3.5.8 image  
775 acquisition software. Chromosomes were anonymized and independently counted twice manually in  
776 Fiji v2.0.0-rc-54/1.51h using the multi-point tool.

777  
778 *Sequencing and analysis pipeline*  
779 Sequencing libraries for high-throughput sequencing were generated using Nextera DNA Library Prep Kit  
780 (Illumina, Inc., San Diego, USA) according to manufacturer's recommendations or using equivalent *Tn5*  
781 transposase expressed in-house as previously described (51). Briefly, genomic DNA was extracted from  
782 FACS-sorted clones, single colonies or pooled samples by standard Protease K digestion (New England  
783 Biolabs GmbH, Frankfurt am Main, Germany) followed by AmpureXP bead (Beckman Coulter GmbH,  
784 Krefeld, Germany) purification. Extracted high-molecular weight DNA was "tagmented" by commercial  
785 or purified *Tn5*-transposase. Each tagmented DNA sample was then PCR amplified with Q5 High-  
786 Fidelity DNA Polymerase (New England Biolabs) using barcoded i7-index primer (N701-N763) and the  
787 N501 i5-index primer. Pooled libraries were sequenced by a HiSeq 3000 (Illumina) at the Genome Core  
788 Facility at the MPI Tübingen Campus. Sequenced data were processed using a custom pipeline  
789 consisting of data clean-up, mapping, base-calling and analysis based upon fastQC v0.10.1 (52);  
790 trimmomatic v0.33 (53); bwa v0.7.10-r789 (54); GATK v3.4-0-gf196186 modules  
791 MarkDuplicates and IndelRealignment (55, 56); samtools v1.2 (57, 58); bcftools v1.2 (59);  
792 and R v 3.2.0 (60). Genotype calls were performed against known informative single and multiple  
793 nucleotide variants between C57BL/6NJ, CAST/EiJ and SPRET/EiJ strains made available by the  
794 Wellcome Trust Sanger Centre (Mouse Genomes Project version 3 dbSNP v137 release (25).  
795 Coverage depths for the reference and alternative alleles were calculated based on the DP4 field in the  
796 variant VCF files. For individual clones, crossover breakpoints were called by TIGER (61), using default  
797 parameters. Custom Perl scripts were used to process files prior to plotting and visualization in R.  
798 Scripts are available upon request.

799  
800 *Laser-assisted morula injection*  
801 Fully ES cell-derived embryos were obtained essentially as previously described in (27). Briefly, female  
802 C57BL/6NCrl mice were mated and host embryos harvested. ES cells from untreated S18 line and two  
803 IVR lines were injected into 8-cell stage embryos (morulae) after perforation of the zona pellucida with a  
804 laser pulse. After incubation for 1.5–2 h, injected embryos were transferred into the oviducts of E0.5  
805 pseudo-pregnant CD1-ICR female foster mice. The host mice were monitored for recovery and  
806 development. At 14 d after the embryo transfer (approximating developmental stage E14.5), the  
807 gestation was terminated, and embryos were individually dissected, fixed with 4% paraformaldehyde for  
808 45 min and stored in PBS. All manipulations were performed by R.N. or under R.N.'s supervision at the  
809 Transgenic Core Facility at the Max Planck Institute of Cell Biology and Genetics, Dresden, Germany.

810  
811 *Micro computer-tomography (microCT)*  
812 Prior to scanning, embryos were perfused for 4 d in 25% Lugol's, or iodine-potassium iodide solution.  
813 Contrast-stained embryos were rehydrated and mounted in 1% agarose and scanned with a Skyscan  
814 1173 instrument (Control software version 1.6, Build 15; Bruker Corporation, Billerica, MA,  
815 USA) at 9.96 micron ( $\mu\text{m}$ ) resolution using a 0.5 mm aluminium filter with energy settings at 70 kV and  
816 110  $\mu\text{A}$ . Volume reconstructions were performed using NRecon v.1.6.10.4 (Bruker Corporation)  
817 using parameters determined based on fine-tuning for each scan (misalignment correction: 23-30; beam-  
818 hardening correction: 25%; ring-artifact correction: 10; no smoothing). Image analysis, segmentation  
819 and visualizations were performed using Amira v6.2.0 (FEI, Hillsboro, OR, USA) with the XImagePAQ  
820 extension 6.2.

821  
822  
823  
824



825 **Figure Supplements**

826 Fig. 1–Figure Supplement 1.

827 Site-specific integration of a versatile selection reporter cassette into the G4 ROSALUC ES cell line.

828

829 Fig. 1–Figure Supplement 2.

830 Normal karyotypes were maintained under culturing and IVR treatment.

831

832 Fig. 2–Figure Supplement 1.

833 ML216 treatment is compatible with ES cell culturing.

834

835 Fig. 2–Figure Supplement 2.

836 Multiplexed PCR genotyping screen for spontaneous recombinants.

837

838 Fig. 3–Figure Supplement 1.

839 Optimal 6-TG concentration for differential *Hprt*-dependent cytotoxicity.

840

841 Fig. 3–Figure Supplement 2.

842 ML216 treatment maintains cell viability.

843

844 Fig. 4–Figure Supplement 1.

845 Recombinant genomes of the two S18 IVR ES cell lines selected for embryo re-derivation.

846

847 Fig. 4–Figure Supplement 2.

848 Whole embryos derived from F1 hybrid S18 non-recombinant and IVR ES cells.

849  
850  
851  
852  
853  
854  
855  
856  
857  
858  
859  
860  
861  
862  
863  
864

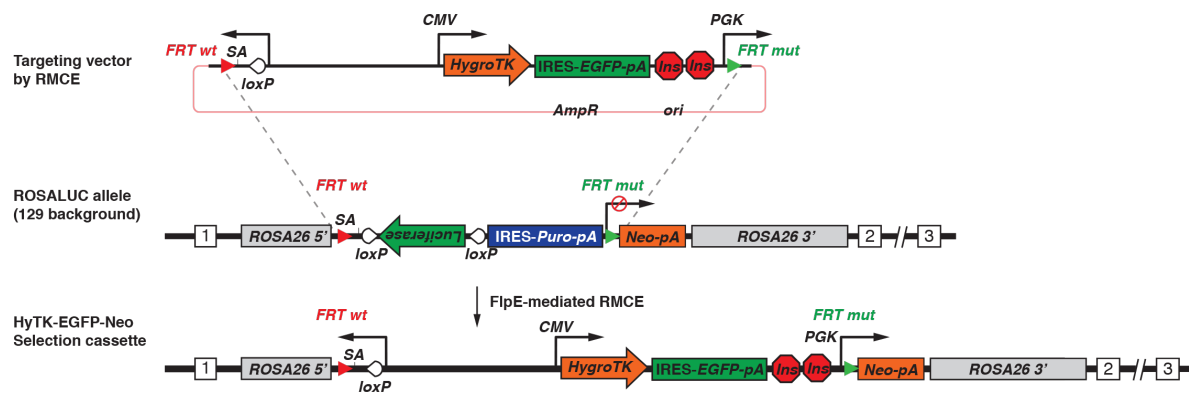

865  
866  
867  
868  
869  
870  
871  
872  
873  
874  
875  
876  
877  
878  
879

**Fig. 1–Figure Supplement 1. Site-specific integration of a versatile selection reporter cassette into the G4 ROSALUC ES cell line.** Utilizing the recombination-mediated cassette exchange (RMCE) technique, the targeting vector was inserted by a *Flp*-recombinase into the ROSALUC allele as previously described (39). The vector introduced the hygromycin phosphotransferase-thymidine kinase (HyTK) fusion selectable marker, the enhanced green fluorescent protein (EGFP) and the phosphoglycerate kinase 1 (PGK) promoter, thus restoring the expression of the latent neomycin resistance gene upon the successful integration of the vector into the ROSALUC allele. Figure modified from (39).

880  
881  
882  
883  
884  
885  
886  
887  
888  
889  
890  
891  
892  
893  
894  
895

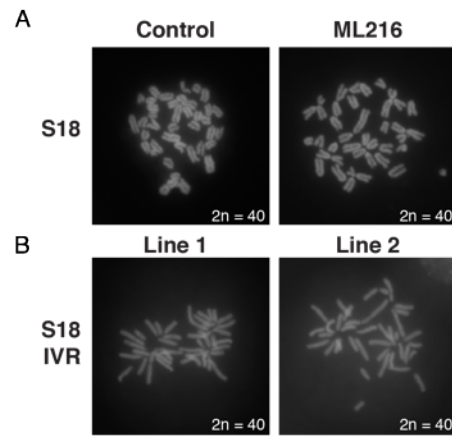

896  
897  
898  
899  
900  
901  
902  
903  
904  
905  
906  
907

**Fig. 1–Figure Supplement 2. Normal karyotypes were maintained under culturing and IVR treatment.** (A) Representative metaphase spreads from S18 line under control and ML216 treatment show normal karyotype of  $2n = 40$ . (B) After confirmed IVR treatment, selected lines 1 and 2 were chosen for re-derivation. The karyotypes of both lines are also normal with high levels of euploidy. Whole embryos derived from laser-assisted morulae injection results showed that the S18 line, and IVR lines 1 and 2 are broadly competent to differentiate into diverse cell lineages (Fig. 4, Fig. 4–Figure Supplements 1 & 2).



908  
909  
910  
911  
912  
913  
914  
915  
916  
917  
918  
919  
920  
921  
922  
923

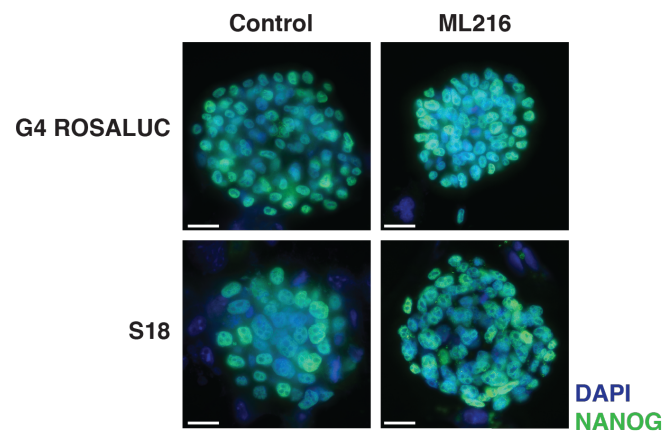

924  
925  
926  
927  
928  
929  
930  
931  
932  
933  
934  
935  
936

**Fig. 2–Figure Supplement 1. ML216 treatment is compatible with ES cell culturing.** To determine if ML216 treatment affects ES cell colony viability and maintenance of stemness, we cultured ES cell strains G4 Rosaluc [(BL6 x 129S) F1] and S18 [(BL6 x SPRET) F1] under control 2i/LIF and 25  $\mu$ M ML216 plus 2i/LIF conditions for 3 days. Both control and ML216 treated colonies showed good colony morphology, cell density and robust stem cell marker NANOG expression in both ES cell lines. We concluded that ML216 induction of *in vitro* recombination is compatible with ES cell culturing across considerable evolutionary divergence. Scale bar = 200  $\mu$ m.

937  
938  
939  
940  
941

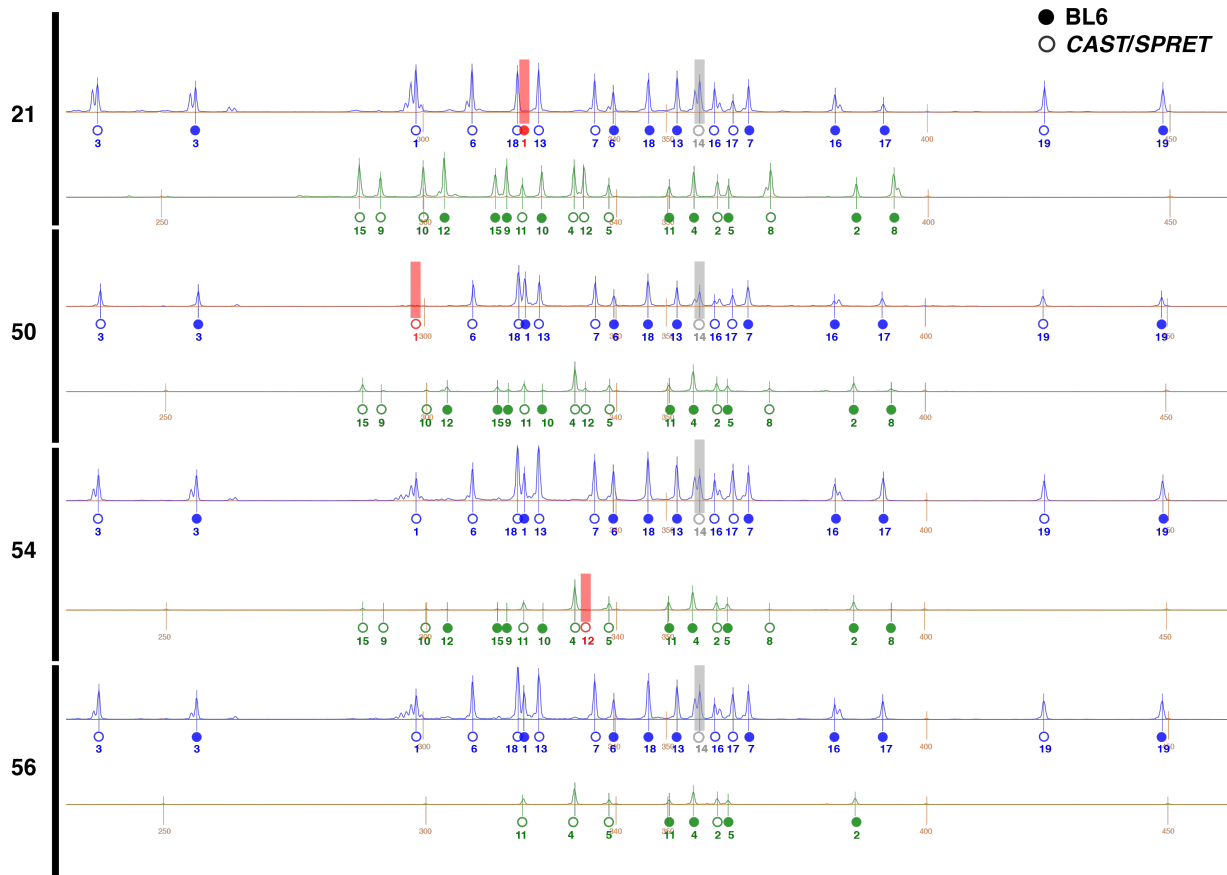

942  
943  
944  
945  
946  
947  
948  
949  
950  
951  
952  
953  
954  
955  
956  
957  
958  
959  
960

**Fig. 2–Figure Supplement 2. Multiplexed PCR genotyping screen for spontaneous recombinants.**

Hybrid ES cells [(BL6 x CAST) F1 hybrid line “E14”] were treated with ML216 and screened by multiplexed PCR genotyping at diagnostic markers within 10Mbp of each autosome chromosome (see Methods & Table S1). Amplified fragment sizes were determined using a capillary sequencer. The markers were designed such that they show staggered fragment sizes, allowing clear identification using fragment analysis software. Shown above are the electropherogram traces corresponding to the clones shown in Fig. 2, out of 46 total clones. The blue (FAM) and green (HEX) channels are shown separately for each sample, adjusted according to size standards (LIZ, orange, in basepairs. Fluorescence levels are shown on arbitrary units on the Y-axis). Genotype calls corresponding to BL6 (solid circles) and CAST or SPRET (open circles) alleles for each chromosome are shown underneath the called peaks (markers were designed for both outgroups. Only E14 analyses are included in this study). Missing genotypes indicative of recombination or LOH events are indicated in red. Chromosome 14 calls were removed due to invariant calls in all samples, including untreated F1 hybrid cells. This approach allowed us to rapidly screen through many colonies to detect possible recombinants. Notably, whole genome sequencing results suggested that in addition to the typical recombination events recovered by this multiplexed fragment analysis, further recombination events may occur elsewhere in the genome.

961  
962  
963  
964  
965

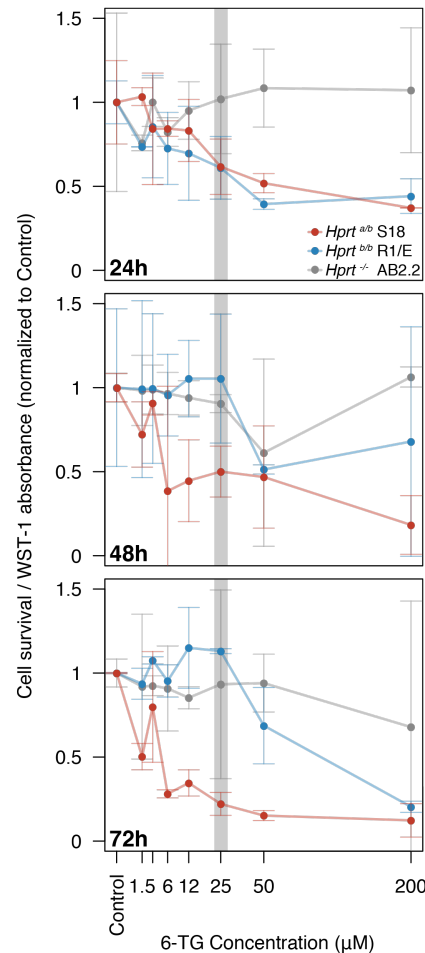

966  
967  
968  
969  
970  
971  
972  
973  
974  
975  
976  
977  
978  
979  
980  
981

**Fig. 3—Figure Supplement 1. Optimal 6-TG concentration for differential *Hprt*-dependent cytotoxicity.** Concentration for 6-TG treatment was determined by treating ES cells with concentrations ranging from 1.5 to 200 µM. Cell survival were determined by a colorimetric WST-1 absorbance assay. ES cells carrying different *Hprt*-a, -b or null alleles on various genetic backgrounds were assayed in duplicates over 24, 48 or 72 hours (*Hprt*<sup>a/b</sup> on (BL6 x SPRET) F1 S18 background: red; *Hprt*<sup>b/b</sup> on R1/E 129X1/129S1 background: blue; and *Hprt*<sup>-/-</sup> on AB2.2 129S5 background: grey). Absorbance values were normalized against control treatment of no 6-TG after subtracting blank measurements. We chose 25 µM 6-TG treatment for subsequent experiments for the strong survival difference between cells carrying *Hprt*<sup>a</sup> and those carrying *Hprt*<sup>b</sup> or null genotypes after 48 h. To ensure genome integrity for sequencing in flow mapping, we performed FACS already after 24 h of 25 µM 6-TG treatment together with a more sensitive DAPI exclusion cell viability assay. Plotted values are normalized mean between replicates ± s.d.

982  
983  
984  
985  
986  
987  
988  
989  
990

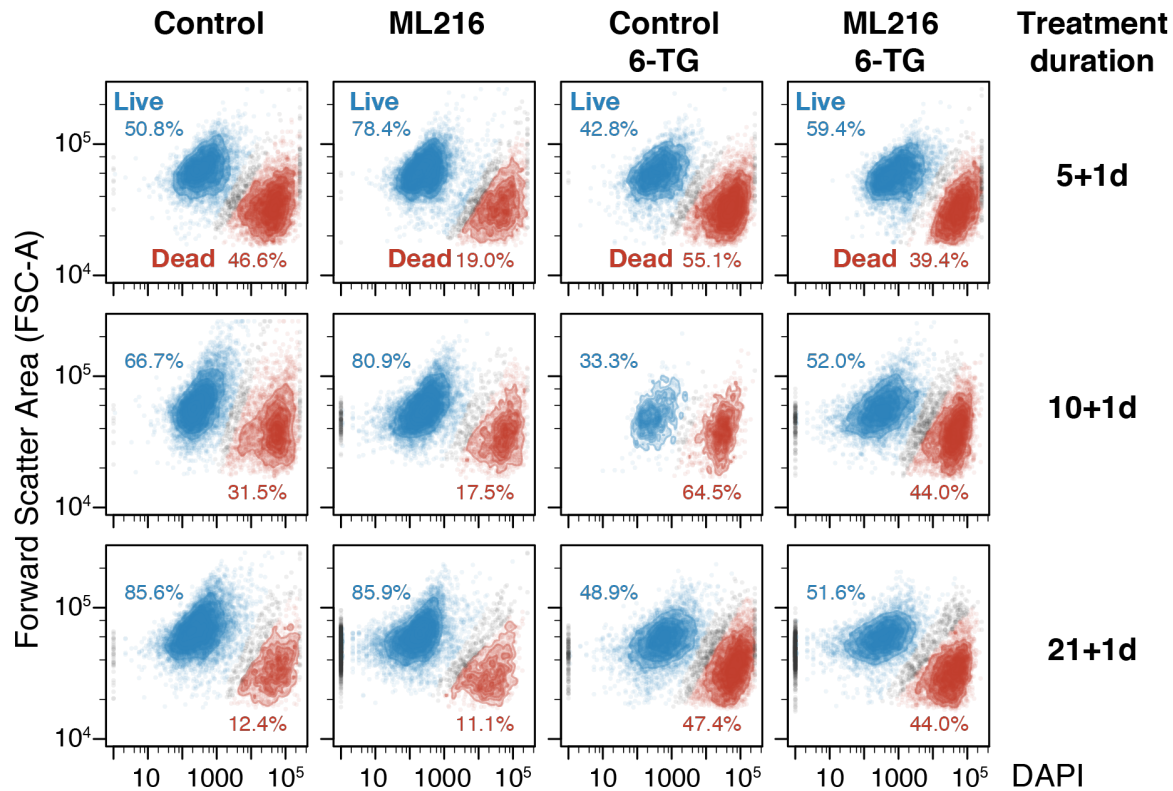

991  
992  
993  
994  
995  
996  
997  
998  
999  
1000  
1001  
1002

**Fig. 3—Figure Supplement 2. ML216 treatment maintains cell viability.** S18 cells under various treatments were analyzed by flow cytometry to determine if ML216 (25  $\mu$ M) treatment induces cell death. Under ML216 treatment alone, cells show robust viability (second column). Only after 1 d 6-TG treatment do the cells exhibit greatly increased cell death, as shown by the increased proportion of the “Dead” population (third column; red). Notably, combined ML216 and 6-TG treatment appears to mitigate cell damage and death, as indicated by the increased proportion of the “Live” population (third vs. fourth column; blue).

1003  
1004  
1005  
1006  
1007  
1008  
1009  
1010

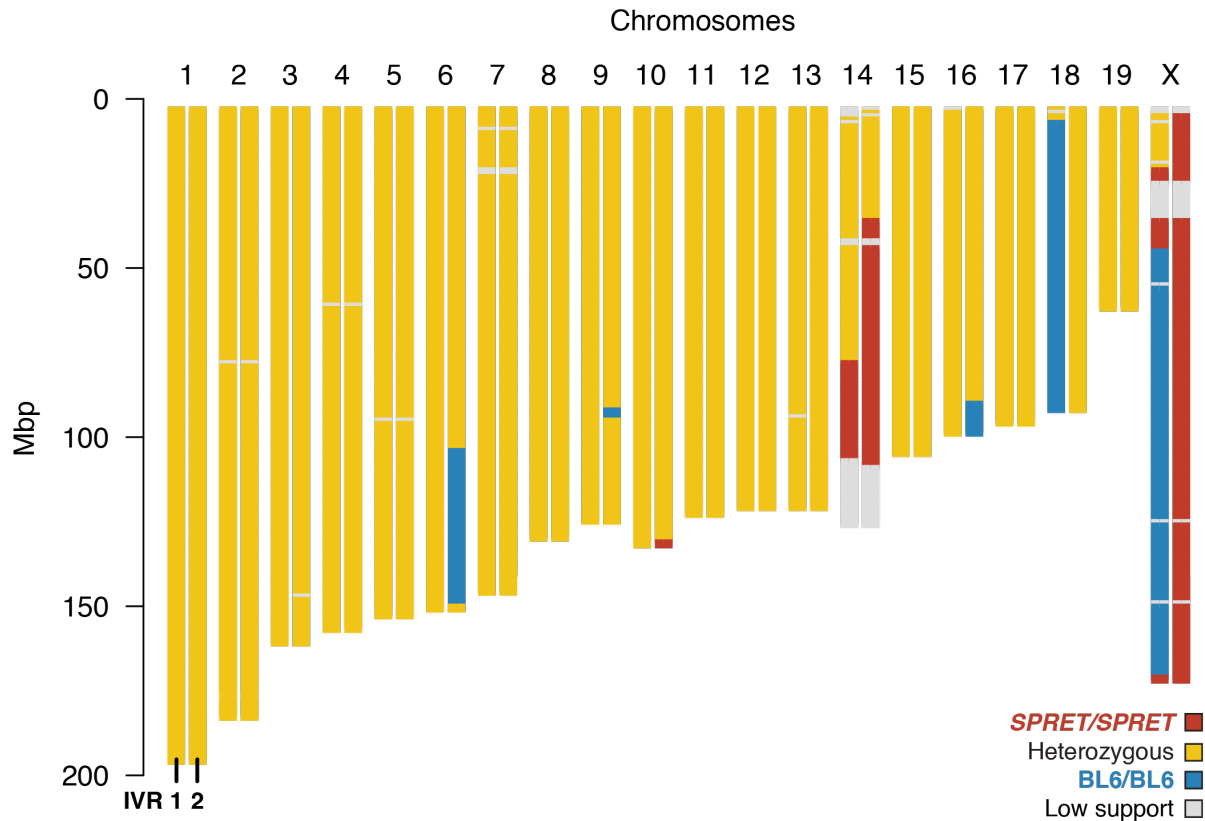

1011  
1012  
1013  
1014  
1015  
1016  
1017  
1018  
1019  
1020  
1021  
1022  
1023  
1024  
1025  
1026  
1027  
1028  
1029  
1030  
1031  
1032

**Fig. 4–Figure Supplement 1. Genome-wide genotype of the two S18 IVR ES cell lines selected for embryo re-derivation.** High-confidence genotypes of each line for each chromosome are plotted as heterozygous (yellow) and the two BL6/BL6 (blue) and *SPRET/SPRET* (red) homozygous genotypes. Low-coverage or repetitive regions were considered ambiguous (grey). Both lines 1 and 2 showed substantial proportion of the genome carrying heterozygous genotypes, reflecting their F1 hybrid origin. Because these lines were obtained through 6-TG selection, much of the observed recombinant genotypes belong to Chromosome X. In addition, we have observed chromosome instability at the distal end of Chromosome 14 (also see Fig. 2–Figure Supplement 2). In addition, there are major genotypic differences between IVR lines 1 and 2 on chromosomes 6, 16 and 18, as well as X. Such recombinant genotype would be difficult, if not impossible to obtain under conventional breeding. These results illustrate the potential of applying IVR at expanded scale to investigate the genetic basis of species divergence.

1033  
1034  
1035  
1036  
1037  
1038  
1039  
1040  
1041  
1042

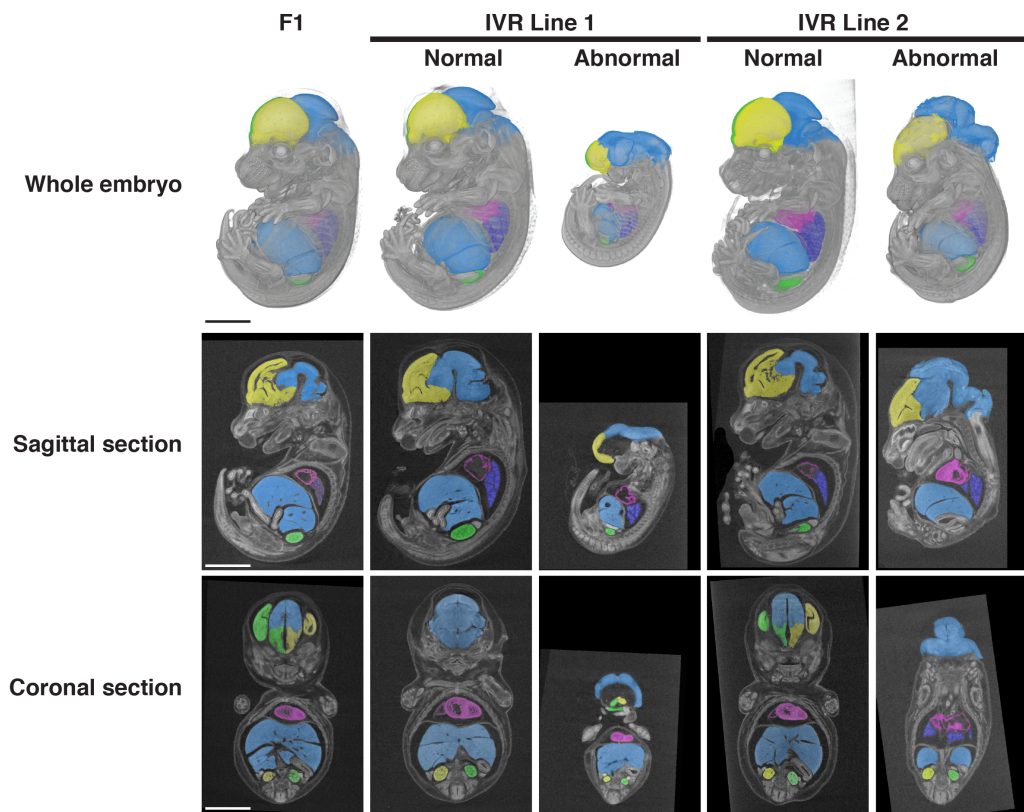

1043  
1044  
1045  
1046  
1047  
1048  
1049  
1050  
1051  
1052  
1053  
1054  
1055  
1056  
1057  
1058  
1059  
1060  
1061  
1062

**Fig. 4—Figure Supplement 2. Whole embryos derived from F1 hybrid S18 non-recombinant and IVR ES cells.** Embryos with almost exclusively ES cell contribution could be generated in the founder generation via laser-assisted morula injection. This allowed phenotyping of organismal traits by circumvention of hybrid sterility. Embryos were dissected in mid-gestation stage (approximately 14.5 days post-coitus, or embryonic E14.5), contrast-stained and scanned using X-ray micro-computer tomography (microCT) at 9.4 micron ( $\mu\text{m}$ ) resolution. The use of contrast staining allowed identification and precise measurements of individual organs (colorized here for clarity). Embryos from non-recombinant S18 ES cells (left column) and two IVR ES cell lines were examined (columns 2–3 and 4–5 respectively). Representative individuals displaying normal and abnormal developmental phenotypes are shown as whole embryos with representative sagittal and coronal sections. In contrast to non-recombinant S18-derived embryos, multiple embryos from each IVR lines showed major craniofacial and neural tube closure defects. Despite a small sample size, such occurrence was highly atypical. Notably, defects in cell migration and cell–cell communication are consistent with hybrid incompatibilities. Following speciation, divergent genotype combinations carried by the same individuals have not been subjected to selection for compatible functions. Consequently, hybrid incompatibilities often result in developmental defects. Derivation of embryos from panels of IVR ES cell lines may allow genetic dissection of developmental variation arising from evolutionary divergences.

1063 **Supplementary Files**  
1064 Table 1.  
1065 Multiplexed recombination detection PCR genotyping primers  
1066

| Chr | Position    |             | Primer       | Sequence (5' – 3')                                      | Amplicon length (bp) |      |       |
|-----|-------------|-------------|--------------|---------------------------------------------------------|----------------------|------|-------|
|     | Start       | End         |              |                                                         | BL6                  | CAST | SPRET |
| 1   | 191,536,961 | 191,537,264 | Forward_M13F | TGTA AACGACGGCCAGTGCACCAGACCCGCTTAGTGTGTGT              | 321                  | 296  | 300   |
|     |             |             | Reverse      | CCTGTGGATGTAGCTCTCAGC                                   |                      |      |       |
| 2   | 173,989,251 | 173,989,620 | Forward      | AGTCCTGGGCTGAAGGAGAT                                    | 387                  | 359  | 359   |
|     |             |             | Reverse_M13R | GCGGATAACAATTTACACAGGACTCATTCTCAGTTCTGGCAGACCA          |                      |      |       |
| 3   | 153,694,525 | 153,694,762 | Forward_M13F | TGTA AACGACGGCCAGTGGCATTGGACAATCCTGTGTGTATG             | 255                  | 236  | 231   |
|     |             |             | Reverse      | TGTGACAGGTCTGTTCCGTG                                    |                      |      |       |
| 4   | 154,084,110 | 154,084,446 | Forward      | ACTTGGGTGGAAGCCTTGTG                                    | 355                  | 331  | 331   |
|     |             |             | Reverse_M13R | GCGGATAACAATTTACACAGGCTCCTCTCTGTCTTTGCCGGTT             |                      |      |       |
| 5   | 148,049,116 | 148,049,460 | Forward      | CCTTTCTGACTACTTTTGGATCAGTCC                             | 361                  | 338  | 338   |
|     |             |             | Reverse_M13R | GCGGATAACAATTTACACAGGGATCCAGAAAAACAAGTGATCAGACAAGTAG    |                      |      |       |
| 6   | 146,150,310 | 146,150,633 | Forward_M13F | TGTA AACGACGGCCAGTGGCAAACGTGGTAGTGAAGCAGG               | 339                  | 311  | 310   |
|     |             |             | Reverse      | TGGCCCTTAGAGTCAGGAC                                     |                      |      |       |
| 7   | 136,216,727 | 136,217,074 | Forward_M13F | TGTA AACGACGGCCAGTGCACAAGGAAGGGTGTTCAGGATG              | 366                  | 335  | 335   |
|     |             |             | Reverse      | CTGTCAGAAGCCAGGGAAGG                                    |                      |      |       |
| 8   | 127,441,747 | 127,442,124 | Forward      | GCTTTCATCAGCAGTTAGAGCAG                                 | 394                  | 369  | 369   |
|     |             |             | Reverse_M13R | GCGGATAACAATTTACACAGGGATTCCACCATGCACTCTACTTTC           |                      |      |       |
| 9   | 121,912,729 | 121,913,029 | Forward      | TTGGTCACGAATCCTCCTGC                                    | 317                  | 291  | 291   |
|     |             |             | Reverse_M13R | GCGGATAACAATTTACACAGGCACTCCTTGGCTCTGGTGGT               |                      |      |       |
| 10  | 125,272,539 | 125,272,846 | Forward      | GTTTCTGCTTATGACCACCCAA                                  | 324                  | 300  | 300   |
|     |             |             | Reverse_M13R | GCGGATAACAATTTACACAGGTCAAGACCTATAGTCTCTCTCAGTGTCTTAT    |                      |      |       |
| 11  | 119,517,460 | 119,517,790 | Forward      | GCACTAGGGACTTGGTCACC                                    | 350                  | 320  | 320   |
|     |             |             | Reverse_M13R | GCGGATAACAATTTACACAGGTTGCTAGGCTGCCTTCATTAGCT            |                      |      |       |
| 12  | 117,814,241 | 117,814,555 | Forward      | CCATTATGGAATTTCTAAGAGTGGCA                              | 332                  | 304  | 304   |
|     |             |             | Reverse_M13R | GCGGATAACAATTTACACAGGGCAGGAAGGGCAGAAGTTT                |                      |      |       |
| 13  | 117,015,681 | 117,016,015 | Forward_M13F | TGTA AACGACGGCCAGTGCCTGCTGCTGCTGCTGCT                   | 351                  | 324  | 324   |
|     |             |             | Reverse      | GGAAGTGTCTTGTCCACCAGTAT                                 |                      |      |       |
| 14  | 106,293,973 | 106,294,368 | Forward_M13F | TGTA AACGACGGCCAGTGCCTGGTGGCAACCAACATCTGTCTACATGG       | 412                  | 388  | 386   |
|     |             |             | Reverse      | GTCATCATGTCTGAAACATTCCTGAGCCTTC                         |                      |      |       |
| 15  | 94,806,342  | 94,806,639  | Forward      | GGCCCTTCTTCTTCGGGAA                                     | 315                  | 288  | 288   |
|     |             |             | Reverse_M13R | GCGGATAACAATTTACACAGGTGTCCCTTAGAAGTGTCCCCTC             |                      |      |       |
| 16  | 93,940,685  | 93,941,051  | Forward_M13F | TGTA AACGACGGCCAGTGGCGCAGACATATCAAGAGTAGCGTTGTGAAGGCTGG | 383                  | 358  | 358   |
|     |             |             | Reverse      | CGAATGCCCACTCCTTCTCTGG                                  |                      |      |       |
| 17  | 84,166,698  | 84,167,073  | Forward_M13F | TGTA AACGACGGCCAGTGATACATTTAACCCGTCTCTACGGGGAGC         | 392                  | 363  | 363   |
|     |             |             | Reverse      | GCCTTACTTACACCTGAGGCCTCC                                |                      |      |       |
| 18  | 82,968,745  | 82,969,071  | Forward_M13F | TGTA AACGACGGCCAGTGGTACAGTGTAGTGTGCTCATATCAGC           | 346                  | 319  | 319   |
|     |             |             | Reverse      | CTGTGCTCACTGCCTCAAGA                                    |                      |      |       |
| 19  | 56,856,486  | 56,856,918  | Forward_M13F | TGTA AACGACGGCCAGTGGTCCATCACTTGCAGAGCCTGCC              | 449                  | 424  | 425   |
|     |             |             | Reverse      | GTTTCAGCAGAACAAGGCAGCAACAAGCATG                         |                      |      |       |
|     |             |             | M13F_FAM     | 5'FAM-TGTA AACGACGGCCAGT                                |                      |      |       |
|     |             |             | M13R-46_HEX  | 5'HEX-TGCGGATAACAATTTACACAGG                            |                      |      |       |

**Table 1.** Oligonucleotide primers for multiplexed genotyping of sub-telomeric markers. Each pair of primers carry a M13-modified extension (underlined) to allow easy attachment of a third, universal fluorophore-conjugated primer for fragment analysis in a capillary sequencer as described in (43).



## Supplementary Movies

### Movie S1.

S18 (untreated) ES-cell derived embryo.

Whole embryos derived from F1 hybrid S18 non-recombinant ES cells. Embryos with almost exclusively ES cell contribution could be generated in the founder generation via laser-assisted morula injection. This allowed phenotyping of organismal traits by circumvention of hybrid sterility. Embryos were dissected in mid-gestation stage (approximately 14.5 d post-coitus, or embryonic E14.5), contrast-stained and scanned using X-ray micro-computer tomography (microCT) at 9.4  $\mu\text{m}$  resolution. The use of contrast staining allowed identification and precise measurements of individual organs (colorized here for clarity).

### Movie S2.

S18 IVR Line 1 ES-cell derived embryos

Whole embryos derived from F1 hybrid S18 IVR Line 1 ES cells. Embryos with almost exclusively ES cell contribution could be generated in the founder generation via laser-assisted morula injection. This allowed phenotyping of organismal traits by circumvention of hybrid sterility. Embryos were dissected in mid-gestation stage (approximately 14.5 d post-coitus, or embryonic E14.5), contrast-stained and scanned using X-ray micro-computer tomography (microCT) at 9.4  $\mu\text{m}$  resolution. The use of contrast staining allowed identification and precise measurements of individual organs (colorized here for clarity).

Representative individuals displaying normal and abnormal developmental phenotypes are shown.

### Movie S3.

S18 IVR Line 2 ES-cell derived embryos

Whole embryos derived from F1 hybrid S18 IVR Line 2 ES cells. Embryos with almost exclusively ES cell contribution could be generated in the founder generation via laser-assisted morula injection. This allowed phenotyping of organismal traits by circumvention of hybrid sterility. Embryos were dissected in mid-gestation stage (approximately 14.5 d post-coitus, or embryonic E14.5), contrast-stained and scanned using X-ray micro-computer tomography (microCT) at 9.4  $\mu\text{m}$  resolution. The use of contrast staining allowed identification and precise measurements of individual organs (colorized here for clarity).

Representative individuals displaying normal and abnormal developmental phenotypes are shown.
